# Supplementary material for: Gene and Protein Expression in Response to Different Growth Temperatures and Oxygen Availability in Burkholderia thailandensis
Source: PLoS One. 2014 Mar 26;9(3):e93009. doi: 10.1371/journal.pone.0093009 (PMC3966863; doi:10.1371/journal.pone.0093009)
Supplement: File S2 — List of the 929 CDS specific for BtCDC272 and relative annotation predicted by FGENESB. (XLS) [file pone.0093009.s006.xls]

## Sheet: Table_BtCDC272_SpecificProtein.
CDS name	Contig coordinates	Strand	COG ID	FgenesB Annotation
Contig_101_3439_2	1580-1813	0	COG:YPO0699	COG: YPO0699 COG3121 # Protein_GI_number: 16121020 # Func_class: N Cell motility; U Intracellular trafficking, secretion, and vesicular transport # Function: P pilus assembly protein, chaperone PapD # Organism: Yersinia pestis # 2 76 164 237 239 62 40.0 3e-10
Contig_1024_1437_1	218-1396	0	COG:no
Contig_1038_7100_2	1420-1659	0	COG:no
Contig_1065_26312_2	2729-4219	0	COG:ZyhjM	COG: ZyhjM COG3405 # Protein_GI_number: 15804074 # Func_class: G Carbohydrate transport and metabolism # Function: Endoglucanase Y # Organism: Escherichia coli O157:H7 EDL933 # 137 492 21 365 368 336 47.0 6e-92
Contig_1065_26312_4	6643-7131	0	COG:no
Contig_1065_26312_5	7556-8023	0	COG:RSp1252	COG: RSp1252 COG1396 # Protein_GI_number: 17549473 # Func_class: K Transcription # Function: Predicted transcriptional regulators # Organism: Ralstonia solanacearum # 19 101 3 85 88 58 40.0 5e-09
Contig_1073_22449_21	18300-18527	0	COG:no
Contig_1073_22449_3	2333-2875	0	COG:no
Contig_1074_2792_1	1-556	0	COG:no
Contig_1078_9285_1	1-336	0	COG:no
Contig_1078_9285_10	6872-7141	0	COG:no
Contig_1078_9285_2	595-1158	0	COG:no
Contig_1078_9285_3	1168-1944	0	COG:no
Contig_1078_9285_4	2081-2809	0	COG:alr0222	COG: alr0222 COG0372 # Protein_GI_number: 17227718 # Func_class: C Energy production and conversion # Function: Citrate synthase # Organism: Nostoc sp. PCC 7120 # 1 217 131 351 378 82 27.0 1e-15
Contig_1078_9285_5	3340-3537	0	COG:no
Contig_1078_9285_8	5110-6342	0	COG:no
Contig_1078_9285_9	6581-6796	0	COG:no
Contig_1084_400_1	145-318	0	COG:no
Contig_1088_27365_10	12827-13357	0	COG:no
Contig_110_1445_1	3-270	0	COG:no
Contig_110_1445_3	1152-1445	0	COG:NMA0357_1	COG: NMA0357_1 COG0340 # Protein_GI_number: 15793366 # Func_class: H Coenzyme transport and metabolism # Function: Biotin-(acetyl-CoA carboxylase) ligase # Organism: Neisseria meningitidis Z2491 # 6 96 241 328 338 58 37.0 2e-09
Contig_1107_1519_2	340-540	0	COG:no
Contig_1120_31272_17	15051-15245	0	COG:no
Contig_1120_31272_25	27072-27515	0	COG:no
Contig_1120_31272_26	28056-28589	0	COG:no
Contig_1126_116_1	3-114	0	COG:no
Contig_1130_3918_6	3727-3916	0	COG:no
Contig_1142_3486_3	3171-3353	0	COG:no
Contig_1157_174_1	1-172	0	COG:no
Contig_1210_2614_5	2387-2605	0	COG:no
Contig_1249_4550_1	19-585	0	COG:no
Contig_1249_4550_2	723-986	0	COG:no
Contig_1249_4550_3	986-1465	0	COG:no
Contig_1249_4550_4	1836-2012	0	COG:no
Contig_1249_4550_5	2005-2262	0	COG:no
Contig_1249_4550_6	2259-2600	0	COG:no
Contig_1250_8866_1	3-291	0	COG:no
Contig_1252_67212_59	59584-59775	0	COG:no
Contig_1253_32527_23	24560-30964	0	COG:all1646	COG: all1646 COG3321 # Protein_GI_number: 17229138 # Func_class: Q Secondary metabolites biosynthesis, transport and catabolism # Function: Polyketide synthase modules and related proteins # Organism: Nostoc sp. PCC 7120 # 354 808 18 476 1263 217 31.0 2e-55
Contig_1253_32527_6	5228-5416	0	COG:no
Contig_1254_8177_6	7165-7698	0	COG:no
Contig_1256_63649_2	253-735	0	COG:no
Contig_1256_63649_29	28680-28820	0	COG:no
Contig_1256_63649_34	33669-33884	0	COG:no
Contig_1256_63649_36	34899-36296	0	COG:mll5777	COG: mll5777 COG0642 # Protein_GI_number: 13474808 # Func_class: T Signal transduction mechanisms # Function: Signal transduction histidine kinase # Organism: Mesorhizobium loti # 76 448 68 439 460 229 36.0 7e-60
Contig_1256_63649_37	36334-37020	0	COG:PA1437	COG: PA1437 COG0745 # Protein_GI_number: 15596634 # Func_class: T Signal transduction mechanisms; K Transcription # Function: Response regulators consisting of a CheY-like receiver domain and a winged-helix DNA-binding domain # Organism: Pseudomonas aeruginosa # 1 223 1 220 229 92 30.0 5e-19
Contig_1256_63649_39	38695-38961	0	COG:no
Contig_1256_63649_42	42208-43407	0	COG:RSp1598	COG: RSp1598 COG0845 # Protein_GI_number: 17549817 # Func_class: M Cell wall/membrane/envelope biogenesis # Function: Membrane-fusion protein # Organism: Ralstonia solanacearum # 13 381 36 407 421 251 42.0 2e-66
Contig_1256_63649_43	43397-46642	0	COG:RSp1597	COG: RSp1597 COG0841 # Protein_GI_number: 17549816 # Func_class: V Defense mechanisms # Function: Cation/multidrug efflux pump # Organism: Ralstonia solanacearum # 4 1059 3 1045 1064 1153 56.0 0
Contig_1256_63649_46	48428-48940	0	COG:no
Contig_1256_63649_5	2185-3045	0	COG:ZflgD	COG: ZflgD COG1843 # Protein_GI_number: 15801192 # Func_class: N Cell motility # Function: Flagellar hook capping protein # Organism: Escherichia coli O157:H7 EDL933 # 71 248 28 211 231 137 44.0 3e-32
Contig_1256_63649_54	58213-59055	0	COG:RSc0663	COG: RSc0663 COG1512 # Protein_GI_number: 17545382 # Func_class: R General function prediction only # Function: Beta-propeller domains of methanol dehydrogenase type # Organism: Ralstonia solanacearum # 1 204 5 221 279 192 50.0 9e-49
Contig_1257_66065_13	11164-11370	0	COG:no
Contig_1257_66065_25	21300-21797	0	COG:no
Contig_1257_66065_28	24742-25218	0	COG:no
Contig_1257_66065_39	32784-33446	0	COG:no
Contig_1257_66065_5	4320-4478	0	COG:no
Contig_1257_66065_53	48908-49402	0	COG:no
Contig_1257_66065_59	56106-57059	0	COG:RSc0538	COG: RSc0538 COG1309 # Protein_GI_number: 17545257 # Func_class: K Transcription # Function: Transcriptional regulator # Organism: Ralstonia solanacearum # 10 249 6 239 340 270 57.0 3e-72
Contig_1257_66065_62	60164-60433	0	COG:no
Contig_1257_66065_7	5478-5675	0	COG:no
Contig_1259_10289_2	470-1438	0	COG:no
Contig_1259_10289_3	1451-4027	0	COG:no
Contig_1259_10289_4	4058-4861	0	COG:no
Contig_1259_10289_6	7360-7518	0	COG:no
Contig_1259_10289_7	7706-8191	0	COG:no
Contig_1259_10289_8	8302-10284	0	COG:no
Contig_1261_112406_20	23669-24136	0	COG:no
Contig_1261_112406_23	27148-27405	0	COG:no
Contig_1261_112406_29	34745-35827	0	COG:sll0264	COG: sll0264 COG4638 # Protein_GI_number: 16331094 # Func_class: P Inorganic ion transport and metabolism; R General function prediction only # Function: Phenylpropionate dioxygenase and related ring-hydroxylating dioxygenases, large terminal subunit # Organism: Synechocystis # 10 196 38 215 396 97 30.0 3e-20
Contig_1261_112406_30	35852-37552	0	COG:no
Contig_1261_112406_31	37602-38687	0	COG:no
Contig_1261_112406_32	38687-40303	0	COG:no
Contig_1261_112406_33	40300-40719	0	COG:no
Contig_1261_112406_35	41339-41782	0	COG:RSp0558	COG: RSp0558 COG2801 # Protein_GI_number: 17548779 # Func_class: L Replication, recombination and repair # Function: Transposase and inactivated derivatives # Organism: Ralstonia solanacearum # 6 87 1 81 280 95 68.0 3e-20
Contig_1261_112406_38	42847-43056	0	COG:no
Contig_1261_112406_43	45342-45515	0	COG:no
Contig_1261_112406_46	47560-47997	0	COG:no
Contig_1261_112406_48	48635-49675	0	COG:alr1386	COG: alr1386 COG3391 # Protein_GI_number: 17228881 # Func_class: S Function unknown # Function: Uncharacterized conserved protein # Organism: Nostoc sp. PCC 7120 # 28 256 308 518 1001 106 37.0 8e-23
Contig_1261_112406_51	51274-51615	0	COG:no
Contig_1261_112406_67	72038-73030	0	COG:no
Contig_1261_112406_74	82742-84574	0	COG:no
Contig_1261_112406_76	87086-87580	0	COG:no
Contig_1261_112406_89	102359-102811	0	COG:no
Contig_1261_112406_91	104438-104623	0	COG:no
Contig_1262_17760_3	1767-2300	0	COG:no
Contig_1264_18200_6	13617-13877	0	COG:no
Contig_1265_24334_10	8814-10202	0	COG:XF1840	COG: XF1840 COG2353 # Protein_GI_number: 15838438 # Func_class: S Function unknown # Function: Uncharacterized conserved protein # Organism: Xylella fastidiosa 9a5c # 248 457 22 230 237 129 32.0 2e-29
Contig_1265_24334_12	11125-11448	0	COG:no
Contig_1265_24334_17	15279-15461	0	COG:no
Contig_1265_24334_20	17992-18150	0	COG:no
Contig_1265_24334_21	18267-18443	0	COG:no
Contig_1265_24334_22	19698-19916	0	COG:no
Contig_1265_24334_23	19888-20049	0	COG:no
Contig_1265_24334_3	2058-2522	0	COG:no
Contig_1265_24334_6	4750-6342	0	COG:ZyeaT	COG: ZyeaT COG0583 # Protein_GI_number: 15802212 # Func_class: K Transcription # Function: Transcriptional regulator # Organism: Escherichia coli O157:H7 EDL933 # 224 521 6 303 314 368 59.0 1e-101
Contig_1266_81754_3	1542-1754	0	COG:no
Contig_1266_81754_47	46596-47069	0	COG:no
Contig_1266_81754_52	50212-50604	0	COG:no
Contig_1266_81754_54	50899-51165	0	COG:no
Contig_1266_81754_56	52256-52438	0	COG:no
Contig_1266_81754_58	62005-62253	0	COG:no
Contig_1266_81754_59	62868-63074	0	COG:no
Contig_1266_81754_61	64066-64275	0	COG:no
Contig_1266_81754_69	80931-81725	0	COG:PA0987	COG: PA0987 COG2801 # Protein_GI_number: 15596184 # Func_class: L Replication, recombination and repair # Function: Transposase and inactivated derivatives # Organism: Pseudomonas aeruginosa # 9 258 7 255 280 193 40.0 3e-49
Contig_1267_56376_11	13286-13462	0	COG:no
Contig_1267_56376_19	21863-22984	0	COG:SMc01511	COG: SMc01511 COG0609 # Protein_GI_number: 15966183 # Func_class: P Inorganic ion transport and metabolism # Function: ABC-type Fe3+-siderophore transport system, permease component # Organism: Sinorhizobium meliloti # 78 372 66 365 366 269 50.0 7e-72
Contig_1267_56376_25	28921-29061	0	COG:no
Contig_1267_56376_30	32544-33104	0	COG:no
Contig_1267_56376_36	38876-39160	0	COG:no
Contig_1267_56376_37	39519-39806	0	COG:no
Contig_1267_56376_46	49605-53456	0	COG:no
Contig_1267_56376_6	6515-7414	0	COG:PA2921	COG: PA2921 COG0583 # Protein_GI_number: 15598117 # Func_class: K Transcription # Function: Transcriptional regulator # Organism: Pseudomonas aeruginosa # 1 293 13 306 329 135 36.0 1e-31
Contig_1268_19060_15	14727-14966	0	COG:no
Contig_1268_19060_2	1106-1384	0	COG:no
Contig_1269_17766_10	12339-15269	0	COG:RSc1289	COG: RSc1289 COG0532 # Protein_GI_number: 17546008 # Func_class: J Translation, ribosomal structure and biogenesis # Function: Translation initiation factor 2 (IF-2; GTPase) # Organism: Ralstonia solanacearum # 240 976 231 964 964 1127 80.0 0
Contig_1269_17766_13	17599-17766	0	COG:no
Contig_126_965_1	3-963	0	COG:no
Contig_1271_24411_23	19633-19830	0	COG:no
Contig_1271_24411_24	19793-20167	0	COG:no
Contig_1271_24411_25	20164-22581	0	COG:no
Contig_1271_24411_26	22808-23038	0	COG:no
Contig_1271_24411_27	23042-23440	0	COG:no
Contig_1271_24411_28	23588-24382	0	COG:PA0987	COG: PA0987 COG2801 # Protein_GI_number: 15596184 # Func_class: L Replication, recombination and repair # Function: Transposase and inactivated derivatives # Organism: Pseudomonas aeruginosa # 9 258 7 255 280 193 40.0 3e-49
Contig_1272_42068_12	11416-11694	0	SUPPORTED	NR: gi|53718510|ref|YP_107496.1| 30S ribosomal protein S20 [Burkholderia pseudomallei K96243] # 1 92 1 92 92 173 100 2e-42
Contig_1272_42068_19	17056-17250	0	COG:no
Contig_1273_40632_11	9859-10467	0	COG:RSc0916	COG: RSc0916 COG1555 # Protein_GI_number: 17545635 # Func_class: L Replication, recombination and repair # Function: DNA uptake protein and related DNA-binding proteins # Organism: Ralstonia solanacearum # 1 94 1 93 105 97 55.0 2e-20
Contig_1273_40632_39	39529-39930	0	SUPPORTED	NR: gi|194563187|ref|YP_002098210.1| Ribosomal protein S6 [Burkholderia dolosa AUO158] # 1 133 1 133 133 267 97 9e-71
Contig_1274_27312_7	5262-5594	0	COG:no
Contig_1275_47595_1	419-730	0	COG:no
Contig_1275_47595_10	7614-7886	0	COG:CC0623	COG: CC0623 COG0610 # Protein_GI_number: 16124876 # Func_class: V Defense mechanisms # Function: Type I site-specific restriction-modification system, R (restriction) subunit and related helicases # Organism: Caulobacter vibrioides # 1 90 827 916 964 78 45.0 3e-15
Contig_1275_47595_11	7980-8165	0	COG:no
Contig_1275_47595_13	10635-10973	0	COG:no
Contig_1275_47595_2	744-1709	0	COG:no
Contig_1275_47595_3	1724-3520	0	COG:no
Contig_1275_47595_30	32188-32421	0	COG:no
Contig_1275_47595_4	3520-4770	0	COG:VC1798	COG: VC1798 COG3267 # Protein_GI_number: 15641801 # Func_class: U Intracellular trafficking, secretion, and vesicular transport # Function: Type II secretory pathway, component ExeA (predicted ATPase) # Organism: Vibrio cholerae # 1 414 15 381 383 207 34.0 4e-53
Contig_1275_47595_5	4772-5134	0	COG:no
Contig_1275_47595_6	5231-5845	0	COG:no
Contig_1275_47595_7	5936-6292	0	COG:STM4219	COG: STM4219 COG5566 # Protein_GI_number: 16767469 # Func_class: S Function unknown # Function: Uncharacterized conserved protein # Organism: Salmonella typhimurium LT2 # 49 111 3 65 67 72 49.0 2e-13
Contig_1275_47595_8	6626-6862	0	COG:no
Contig_1275_47595_9	6781-7125	0	COG:no
Contig_1276_51315_12	15231-16370	0	COG:RSc1752	COG: RSc1752 COG4177 # Protein_GI_number: 17546471 # Func_class: E Amino acid transport and metabolism # Function: ABC-type branched-chain amino acid transport system, permease component # Organism: Ralstonia solanacearum # 21 308 38 334 440 291 54.0 1e-78
Contig_1276_51315_4	6093-6527	0	COG:RSc0214	COG: RSc0214 COG0583 # Protein_GI_number: 17544933 # Func_class: K Transcription # Function: Transcriptional regulator # Organism: Ralstonia solanacearum # 11 110 187 287 288 90 49.0 7e-19
Contig_1276_51315_5	6294-8696	0	COG:RSc0805	COG: RSc0805 COG0477 # Protein_GI_number: 17545524 # Func_class: G Carbohydrate transport and metabolism; E Amino acid transport and metabolism; P Inorganic ion transport and metabolism; R General function prediction only # Function: Permeases of the major facilitator superfamily # Organism: Ralstonia solanacearum # 322 499 20 199 409 159 51.0 3e-38
Contig_1277_61169_12	10641-11450	0	COG:no
Contig_1277_61169_17	17306-17668	0	COG:no
Contig_1277_61169_38	41034-41249	0	COG:no
Contig_1277_61169_40	42440-42865	0	COG:RSp0478	COG: RSp0478 COG3328 # Protein_GI_number: 17548699 # Func_class: L Replication, recombination and repair # Function: Transposase and inactivated derivatives # Organism: Ralstonia solanacearum # 1 106 190 294 416 186 86.0 1e-47
Contig_1277_61169_8	6363-6710	0	COG:no
Contig_1278_23475_16	18630-18986	0	COG:no
Contig_1278_23475_9	9407-10498	0	COG:RSc2857	COG: RSc2857 COG0318 # Protein_GI_number: 17547576 # Func_class: I Lipid transport and metabolism; Q Secondary metabolites biosynthesis, transport and catabolism # Function: Acyl-CoA synthetases (AMP-forming)/AMP-acid ligases II # Organism: Ralstonia solanacearum # 112 355 1 245 569 358 71.0 6e-99
Contig_1279_33759_20	21956-22159	0	COG:no
Contig_1279_33759_3	2228-2524	0	COG:no
Contig_1279_33759_9	10454-10663	0	COG:no
Contig_1280_36093_11	10838-13417	0	COG:PA2097	COG: PA2097 COG2072 # Protein_GI_number: 15597293 # Func_class: P Inorganic ion transport and metabolism # Function: Predicted flavoprotein involved in K+ transport # Organism: Pseudomonas aeruginosa # 11 496 6 491 491 545 55.0 1e-154
Contig_1280_36093_14	16608-17132	0	COG:no
Contig_1280_36093_17	19187-19939	0	COG:no
Contig_1280_36093_18	19929-20735	0	COG:Rv2509	COG: Rv2509 COG0300 # Protein_GI_number: 15609646 # Func_class: R General function prediction only # Function: Short-chain dehydrogenases of various substrate specificities # Organism: Mycobacterium tuberculosis H37Rv # 1 263 1 267 268 258 51.0 7e-69
Contig_1280_36093_26	29914-30381	0	COG:no
Contig_1280_36093_29	32589-34844	0	COG:PA2550	COG: PA2550 COG1960 # Protein_GI_number: 15597746 # Func_class: I Lipid transport and metabolism # Function: Acyl-CoA dehydrogenases # Organism: Pseudomonas aeruginosa # 342 745 1 400 409 520 63.0 1e-147
Contig_1280_36093_3	1810-4353	0	COG:mll9511_1	COG: mll9511_1 COG0643 # Protein_GI_number: 13488379 # Func_class: N Cell motility; T Signal transduction mechanisms # Function: Chemotaxis protein histidine kinase and related kinases # Organism: Mesorhizobium loti # 245 715 149 623 630 461 53.0 1e-129
Contig_1280_36093_8	9458-9769	0	COG:no
Contig_1280_36093_9	9668-9898	0	COG:no
Contig_1281_35786_23	24762-24983	0	COG:no
Contig_1281_35786_24	25513-26106	0	COG:no
Contig_1281_35786_6	6934-7122	0	COG:no
Contig_1282_6831_1	1-430	0	COG:no
Contig_1283_14851_1	96-824	0	COG:no
Contig_1283_14851_13	11900-12448	0	COG:no
Contig_1283_14851_15	14028-14822	0	COG:PA0987	COG: PA0987 COG2801 # Protein_GI_number: 15596184 # Func_class: L Replication, recombination and repair # Function: Transposase and inactivated derivatives # Organism: Pseudomonas aeruginosa # 9 258 7 255 280 193 40.0 3e-49
Contig_1284_17786_12	15303-15578	0	COG:no
Contig_1284_17786_13	15578-16258	0	COG:AGc4599	COG: AGc4599 COG1853 # Protein_GI_number: 15889796 # Func_class: R General function prediction only # Function: Conserved protein/domain typically associated with flavoprotein oxygenases, DIM6/NTAB family # Organism: Agrobacterium tumefaciens strain C58 (Cereon) # 58 215 12 172 179 108 37.0 9e-24
Contig_1284_17786_6	7784-7951	0	COG:no
Contig_1285_19048_10	6652-7080	0	COG:no
Contig_1285_19048_11	7139-7324	0	COG:no
Contig_1285_19048_12	7345-8037	0	COG:no
Contig_1285_19048_13	8148-8999	0	COG:no
Contig_1285_19048_14	9252-9719	0	COG:no
Contig_1285_19048_3	2860-3546	0	COG:no
Contig_1285_19048_4	3682-3897	0	COG:YPO1904	COG: YPO1904 COG3311 # Protein_GI_number: 16122151 # Func_class: K Transcription # Function: Predicted transcriptional regulator # Organism: Yersinia pestis # 13 61 38 86 93 58 48.0 3e-09
Contig_1285_19048_5	3902-4231	0	COG:no
Contig_1285_19048_6	4165-4461	0	COG:no
Contig_1285_19048_7	4414-5040	0	COG:no
Contig_1285_19048_8	5027-6142	0	COG:SPy0671	COG: SPy0671 COG3598 # Protein_GI_number: 15674737 # Func_class: L Replication, recombination and repair # Function: RecA-family ATPase # Organism: Streptococcus pyogenes M1 GAS # 39 231 337 526 757 64 27.0 3e-10
Contig_1285_19048_9	6320-6655	0	COG:no
Contig_1287_2187_1	44-409	0	COG:Z1957	COG: Z1957 COG2801 # Protein_GI_number: 15801416 # Func_class: L Replication, recombination and repair # Function: Transposase and inactivated derivatives # Organism: Escherichia coli O157:H7 EDL933 # 17 113 196 291 296 127 60.0 5e-30
Contig_1287_2187_2	532-1173	0	COG:no
Contig_1287_2187_3	1364-2158	0	COG:PA0987	COG: PA0987 COG2801 # Protein_GI_number: 15596184 # Func_class: L Replication, recombination and repair # Function: Transposase and inactivated derivatives # Organism: Pseudomonas aeruginosa # 9 258 7 255 280 193 40.0 3e-49
Contig_1288_6180_2	759-1046	0	COG:no
Contig_1288_6180_3	1257-1709	0	COG:no
Contig_1289_22674_14	13304-13483	0	COG:no
Contig_1289_22674_2	733-2136	0	COG:RSc2324	COG: RSc2324 COG0477 # Protein_GI_number: 17547043 # Func_class: G Carbohydrate transport and metabolism; E Amino acid transport and metabolism; P Inorganic ion transport and metabolism; R General function prediction only # Function: Permeases of the major facilitator superfamily # Organism: Ralstonia solanacearum # 2 467 4 469 475 307 47.0 2e-83
Contig_1290_54070_18	18837-19190	0	COG:no
Contig_1290_54070_19	18880-19611	0	COG:no
Contig_1290_54070_20	19730-19966	0	COG:no
Contig_1290_54070_22	20934-21674	0	COG:no
Contig_1290_54070_26	26961-27134	0	COG:no
Contig_1290_54070_3	2572-3057	0	COG:no
Contig_1290_54070_34	34684-35811	0	COG:no
Contig_1290_54070_4	3155-3328	0	COG:no
Contig_1290_54070_6	5125-5379	0	COG:no
Contig_1291_28790_22	25768-26394	0	COG:no
Contig_1291_28790_23	26433-26891	0	COG:no
Contig_1291_28790_7	7605-7781	0	COG:no
Contig_1293_10417_2	1577-1858	0	COG:no
Contig_1293_10417_3	1855-2418	0	COG:RSc2896	COG: RSc2896 COG0741 # Protein_GI_number: 17547615 # Func_class: M Cell wall/membrane/envelope biogenesis # Function: Soluble lytic murein transglycosylase and related regulatory proteins (some contain LysM/invasin domains) # Organism: Ralstonia solanacearum # 15 154 22 161 170 129 46.0 2e-30
Contig_1293_10417_5	3544-3894	0	COG:no
Contig_129_336_1	2-302	0	COG:no
Contig_1295_54378_2	1423-1659	0	COG:no
Contig_1295_54378_29	30066-30260	0	COG:no
Contig_1295_54378_45	47023-47295	0	COG:no
Contig_1295_54378_8	5818-6750	0	COG:RSc1558	COG: RSc1558 COG0655 # Protein_GI_number: 17546277 # Func_class: R General function prediction only # Function: Multimeric flavodoxin WrbA # Organism: Ralstonia solanacearum # 109 302 5 196 201 293 73.0 2e-79
Contig_1296_47184_21	28537-28815	0	COG:no
Contig_1298_10566_1	490-1089	0	COG:YPO0762	COG: YPO0762 COG3209 # Protein_GI_number: 16121077 # Func_class: M Cell wall/membrane/envelope biogenesis # Function: Rhs family protein # Organism: Yersinia pestis # 2 119 1 116 1438 82 42.0 5e-16
Contig_1300_26674_1	3-1065	0	COG:no
Contig_1300_26674_11	8318-8806	0	COG:no
Contig_1300_26674_2	1448-1663	0	COG:no
Contig_1300_26674_21	18771-19064	0	COG:no
Contig_1300_26674_3	1819-2004	0	COG:no
Contig_1301_40931_7	6139-6267	0	COG:no
Contig_1301_40931_9	6903-7070	0	COG:no
Contig_1302_26464_14	13539-13760	0	COG:no
Contig_1302_26464_15	14343-14504	0	COG:no
Contig_1304_33625_1	207-548	0	COG:no
Contig_1304_33625_18	19374-19745	0	COG:no
Contig_1304_33625_24	22628-22858	0	COG:no
Contig_1304_33625_7	6341-7759	0	COG:Cj0189c	COG: Cj0189c COG1432 # Protein_GI_number: 15791576 # Func_class: S Function unknown # Function: Uncharacterized conserved protein # Organism: Campylobacter jejuni # 10 249 6 203 232 77 27.0 7e-14
Contig_1305_22916_10	8104-8283	0	COG:no
Contig_1305_22916_12	9566-10063	0	COG:no
Contig_1305_22916_13	10277-10885	0	COG:no
Contig_1305_22916_3	2713-2928	0	COG:no
Contig_1305_22916_9	7104-7616	0	COG:no
Contig_1307_38676_10	9422-9628	0	COG:no
Contig_1307_38676_12	10934-11119	0	COG:no
Contig_1307_38676_21	20572-21051	0	COG:RSp0829	COG: RSp0829 COG4948 # Protein_GI_number: 17549050 # Func_class: M Cell wall/membrane/envelope biogenesis; R General function prediction only # Function: L-alanine-DL-glutamate epimerase and related enzymes of enolase superfamily # Organism: Ralstonia solanacearum # 26 148 321 443 445 209 79.0 1e-54
Contig_1307_38676_28	30153-31547	0	COG:YPO1825	COG: YPO1825 COG3144 # Protein_GI_number: 16122078 # Func_class: N Cell motility # Function: Flagellar hook-length control protein # Organism: Yersinia pestis # 298 408 277 393 450 91 43.0 4e-18
Contig_1307_38676_8	7750-8103	0	COG:no
Contig_1308_20275_14	18539-18919	0	COG:RSc3040	COG: RSc3040 COG0690 # Protein_GI_number: 17547759 # Func_class: U Intracellular trafficking, secretion, and vesicular transport # Function: Preprotein translocase subunit SecE # Organism: Ralstonia solanacearum # 1 126 1 126 126 140 60.0 5e-34
Contig_1308_20275_3	3222-3440	0	COG:no
Contig_1308_20275_9	15473-15847	0	SUPPORTED	NR: gi|83719193|ref|YP_443581.1| 50S ribosomal protein L7/L12 [Burkholderia thailandensis E264] # 1 124 1 124 124 231 100 4e-60
Contig_1309_2773_2	1217-1387	0	COG:no
Contig_1310_88082_41	28196-28480	0	COG:no
Contig_1310_88082_93	80444-81418	0	COG:RSc2931	COG: RSc2931 COG0327 # Protein_GI_number: 17547650 # Func_class: S Function unknown # Function: Uncharacterized conserved protein # Organism: Ralstonia solanacearum # 77 324 1 248 248 310 59.0 4e-84
Contig_1312_64973_1	3-1275	0	COG:AGpA441	COG: AGpA441 COG0372 # Protein_GI_number: 16119535 # Func_class: C Energy production and conversion # Function: Citrate synthase # Organism: Agrobacterium tumefaciens strain C58 (Cereon) # 4 424 40 416 425 255 42.0 1e-67
Contig_1312_64973_29	33558-34646	0	COG:RSc2444	COG: RSc2444 COG2003 # Protein_GI_number: 17547163 # Func_class: L Replication, recombination and repair # Function: DNA repair proteins # Organism: Ralstonia solanacearum # 50 199 12 161 224 151 53.0 2e-36
Contig_1312_64973_54	55303-56580	0	COG:mlr0958	COG: mlr0958 COG0582 # Protein_GI_number: 13471077 # Func_class: L Replication, recombination and repair # Function: Integrase # Organism: Mesorhizobium loti # 126 421 105 400 417 85 26.0 2e-16
Contig_1312_64973_55	56792-59905	0	COG:CC0623	COG: CC0623 COG0610 # Protein_GI_number: 16124876 # Func_class: V Defense mechanisms # Function: Type I site-specific restriction-modification system, R (restriction) subunit and related helicases # Organism: Caulobacter vibrioides # 3 942 2 939 964 1307 67.0 0
Contig_1312_64973_56	59961-60893	0	COG:BMEII0447_2	COG: BMEII0447_2 COG3586 # Protein_GI_number: 17988792 # Func_class: S Function unknown # Function: Uncharacterized conserved protein # Organism: Brucella melitensis # 117 307 1 192 195 157 48.0 2e-38
Contig_1312_64973_57	60890-62179	0	COG:CC0621	COG: CC0621 COG0732 # Protein_GI_number: 16124874 # Func_class: V Defense mechanisms # Function: Restriction endonuclease S subunits # Organism: Caulobacter vibrioides # 1 429 1 450 450 166 31.0 1e-40
Contig_1312_64973_58	62176-64017	0	COG:CC0620	COG: CC0620 COG0286 # Protein_GI_number: 16124873 # Func_class: V Defense mechanisms # Function: Type I restriction-modification system methyltransferase subunit # Organism: Caulobacter vibrioides # 1 612 1 610 611 931 75.0 0
Contig_1312_64973_59	64125-64289	0	COG:no
Contig_1312_64973_6	6823-7038	0	COG:no
Contig_1312_64973_60	64351-64611	0	COG:no
Contig_1313_73879_49	52781-53560	0	COG:mll7083	COG: mll7083 COG1028 # Protein_GI_number: 13475902 # Func_class: I Lipid transport and metabolism; Q Secondary metabolites biosynthesis, transport and catabolism; R General function prediction only # Function: Dehydrogenases with different specificities (related to short-chain alcohol dehydrogenases) # Organism: Mesorhizobium loti # 3 259 4 258 258 305 61.0 4e-83
Contig_1313_73879_60	64815-65006	0	COG:no
Contig_1313_73879_67	69835-69981	0	SUPPORTED	NR: gi|167580521|ref|ZP_02373395.1| ribosomal protein L11 methyltransferase [Burkholderia thailandensis TXDOH] # 1 48 1 48 48 98 100 9e-20
Contig_1313_73879_72	73545-73877	0	COG:no
Contig_1314_23284_19	15752-16324	0	COG:no
Contig_1314_23284_20	16637-16867	0	COG:no
Contig_1314_23284_22	17250-18710	0	COG:PA2199	COG: PA2199 COG2084 # Protein_GI_number: 15597395 # Func_class: I Lipid transport and metabolism # Function: 3-hydroxyisobutyrate dehydrogenase and related beta-hydroxyacid dehydrogenases # Organism: Pseudomonas aeruginosa # 198 486 1 290 291 277 49.0 3e-74
Contig_1314_23284_9	6979-7140	0	SUPPORTED	NR: gi|161372039|ref|ZP_02111602.1| hypothetical protein Bpse17_20855 [Burkholderia pseudomallei 1710a] # 1 53 1 53 53 76 73 1e-13
Contig_1315_73884_1	3-1344	0	COG:PM0714	COG: PM0714 COG5295 # Protein_GI_number: 15602579 # Func_class: U Intracellular trafficking, secretion, and vesicular transport; W Extracellular structures # Function: Autotransporter adhesin # Organism: Pasteurella multocida # 187 351 542 689 2712 69 40.0 1e-11
Contig_1315_73884_10	8501-8719	0	COG:no
Contig_1315_73884_12	9926-10441	0	COG:no
Contig_1315_73884_34	34725-34886	0	COG:no
Contig_1315_73884_45	46050-46361	0	SUPPORTED	NR: gi|167615781|ref|ZP_02384416.1| 30S ribosomal protein S21 [Burkholderia thailandensis Bt4] # 1 103 1 103 103 206 99 2e-52
Contig_1315_73884_56	54758-56194	0	COG:RSp0052	COG: RSp0052 COG0477 # Protein_GI_number: 17548273 # Func_class: G Carbohydrate transport and metabolism; E Amino acid transport and metabolism; P Inorganic ion transport and metabolism; R General function prediction only # Function: Permeases of the major facilitator superfamily # Organism: Ralstonia solanacearum # 19 469 16 466 476 723 84.0 0
Contig_1315_73884_61	65027-65284	0	COG:no
Contig_1315_73884_9	8053-8328	0	COG:no
Contig_1318_3558_3	2114-2710	0	COG:no
Contig_1318_3558_4	2574-3338	0	COG:RSp1217	COG: RSp1217 COG2801 # Protein_GI_number: 17549438 # Func_class: L Replication, recombination and repair # Function: Transposase and inactivated derivatives # Organism: Ralstonia solanacearum # 3 198 2 197 275 337 86.0 1e-92
Contig_1318_3558_5	3362-3556	0	COG:RSp1216	COG: RSp1216 COG2801 # Protein_GI_number: 17549437 # Func_class: L Replication, recombination and repair # Function: Transposase and inactivated derivatives # Organism: Ralstonia solanacearum # 1 64 24 87 87 126 95.0 1e-29
Contig_1319_11933_9	10103-10648	0	COG:no
Contig_1320_45363_13	14521-16500	0	COG:PA4571_1	COG: PA4571_1 COG2010 # Protein_GI_number: 15599767 # Func_class: C Energy production and conversion # Function: Cytochrome c, mono- and diheme variants # Organism: Pseudomonas aeruginosa # 1 425 33 441 441 560 62.0 1e-159
Contig_1320_45363_2	962-3694	0	COG:RSc0030	COG: RSc0030 COG1167 # Protein_GI_number: 17544749 # Func_class: K Transcription; E Amino acid transport and metabolism # Function: Transcriptional regulators containing a DNA-binding HTH domain and an aminotransferase domain (MocR family) and their eukaryotic orthologs # Organism: Ralstonia solanacearum # 406 897 12 505 509 540 56.0 1e-153
Contig_1320_45363_20	25155-25388	0	COG:no
Contig_1320_45363_33	39554-39664	0	COG:no
Contig_1320_45363_37	43202-45362	0	COG:no
Contig_1320_45363_9	10966-11208	0	COG:no
Contig_1321_56325_1	1-1056	0	COG:no
Contig_1321_56325_21	27597-28586	0	COG:no
Contig_1321_56325_24	31142-33307	0	COG:mll4435	COG: mll4435 COG0583 # Protein_GI_number: 13473737 # Func_class: K Transcription # Function: Transcriptional regulator # Organism: Mesorhizobium loti # 380 675 6 302 304 271 51.0 5e-72
Contig_1321_56325_25	33002-33562	0	COG:SMb21168	COG: SMb21168 COG2814 # Protein_GI_number: 16264582 # Func_class: G Carbohydrate transport and metabolism # Function: Arabinose efflux permease # Organism: Sinorhizobium meliloti # 16 132 241 356 394 60 35.0 2e-09
Contig_1321_56325_29	35803-36072	0	COG:no
Contig_1321_56325_30	36069-36290	0	COG:no
Contig_1321_56325_37	43024-43488	0	COG:RSc2194	COG: RSc2194 COG0799 # Protein_GI_number: 17546913 # Func_class: S Function unknown # Function: Uncharacterized homolog of plant Iojap protein # Organism: Ralstonia solanacearum # 1 118 1 118 203 216 83.0 2e-56
Contig_1321_56325_4	4728-4937	0	COG:no
Contig_1321_56325_46	51525-51632	0	COG:no
Contig_1321_56325_6	6600-6764	0	COG:no
Contig_1322_70468_10	10761-11039	0	COG:tra8_g3	COG: tra8_g3 COG2826 # Protein_GI_number: 16132105 # Func_class: L Replication, recombination and repair # Function: Transposase and inactivated derivatives, IS30 family # Organism: Escherichia coli K12 # 1 83 298 380 383 113 59.0 7e-26
Contig_1322_70468_11	11060-11500	0	COG:Rv3191c	COG: Rv3191c COG2826 # Protein_GI_number: 15610327 # Func_class: L Replication, recombination and repair # Function: Transposase and inactivated derivatives, IS30 family # Organism: Mycobacterium tuberculosis H37Rv # 1 136 1 133 344 80 42.0 7e-16
Contig_1322_70468_12	12073-13092	0	COG:RSc1554	COG: RSc1554 COG0582 # Protein_GI_number: 17546273 # Func_class: L Replication, recombination and repair # Function: Integrase # Organism: Ralstonia solanacearum # 1 338 1 353 354 190 35.0 3e-48
Contig_1322_70468_13	13191-14336	0	COG:RSc1554	COG: RSc1554 COG0582 # Protein_GI_number: 17546273 # Func_class: L Replication, recombination and repair # Function: Integrase # Organism: Ralstonia solanacearum # 1 344 1 354 354 266 42.0 5e-71
Contig_1322_70468_14	14721-17117	0	COG:no
Contig_1322_70468_15	17127-18005	0	COG:no
Contig_1322_70468_16	18211-18480	0	COG:no
Contig_1322_70468_17	18593-18862	0	COG:no
Contig_1322_70468_19	19512-20327	0	COG:no
Contig_1322_70468_20	20539-21084	0	COG:no
Contig_1322_70468_22	22326-23789	0	COG:no
Contig_1322_70468_24	24957-25202	0	COG:no
Contig_1322_70468_27	27564-28124	0	COG:no
Contig_1322_70468_3	4022-4198	0	COG:no
Contig_1322_70468_32	32029-32199	0	COG:no
Contig_1322_70468_33	32312-32587	0	COG:no
Contig_1322_70468_36	34451-34708	0	COG:no
Contig_1322_70468_38	35801-36922	0	COG:mll6491	COG: mll6491 COG0671 # Protein_GI_number: 13475427 # Func_class: I Lipid transport and metabolism # Function: Membrane-associated phospholipid phosphatase # Organism: Mesorhizobium loti # 32 332 5 316 328 123 29.0 5e-28
Contig_1322_70468_4	4329-4484	0	COG:no
Contig_1322_70468_6	5318-5668	0	COG:no
Contig_1322_70468_61	62822-63061	0	COG:no
Contig_1324_71322_17	20856-21554	0	COG:all7521	COG: all7521 COG0693 # Protein_GI_number: 17158657 # Func_class: R General function prediction only # Function: Putative intracellular protease/amidase # Organism: Nostoc sp. PCC 7120 # 11 225 9 224 226 137 38.0 1e-32
Contig_1324_71322_18	21572-22660	0	COG:CC2960	COG: CC2960 COG4977 # Protein_GI_number: 16127190 # Func_class: K Transcription # Function: Transcriptional regulator containing an amidase domain and an AraC-type DNA-binding HTH domain # Organism: Caulobacter vibrioides # 42 348 1 299 312 246 44.0 7e-65
Contig_1324_71322_36	48180-52067	0	COG:alr2678_1	COG: alr2678_1 COG0318 # Protein_GI_number: 17230170 # Func_class: I Lipid transport and metabolism; Q Secondary metabolites biosynthesis, transport and catabolism # Function: Acyl-CoA synthetases (AMP-forming)/AMP-acid ligases II # Organism: Nostoc sp. PCC 7120 # 9 681 18 615 615 441 38.0 1e-123
Contig_1324_71322_50	69012-69281	0	COG:no
Contig_1326_40075_1	3-681	0	COG:no
Contig_1326_40075_11	29618-30127	0	COG:PA2349	COG: PA2349 COG1464 # Protein_GI_number: 15597545 # Func_class: P Inorganic ion transport and metabolism # Function: ABC-type metal ion transport system, periplasmic component/surface antigen # Organism: Pseudomonas aeruginosa # 32 139 19 130 264 98 46.0 6e-21
Contig_1326_40075_13	31572-32174	0	COG:no
Contig_1326_40075_17	35279-35851	0	COG:no
Contig_1326_40075_9	27577-27816	0	COG:no
Contig_1327_34276_12	14277-14549	0	COG:no
Contig_1327_34276_13	14713-15537	0	COG:RSc1589	COG: RSc1589 COG5429 # Protein_GI_number: 17546308 # Func_class: S Function unknown # Function: Uncharacterized secreted protein # Organism: Ralstonia solanacearum # 19 273 13 266 267 167 42.0 3e-41
Contig_1327_34276_14	15581-16543	0	COG:RSc0619	COG: RSc0619 COG4117 # Protein_GI_number: 17545338 # Func_class: C Energy production and conversion # Function: Thiosulfate reductase cytochrome B subunit (membrane anchoring protein) # Organism: Ralstonia solanacearum # 120 319 13 211 212 219 56.0 7e-57
Contig_1327_34276_5	7605-7805	0	COG:no
Contig_1327_34276_7	9171-9698	0	COG:no
Contig_1327_34276_9	10864-11088	0	COG:no
Contig_1328_37997_1	3-713	0	COG:CAC2199	COG: CAC2199 COG3882 # Protein_GI_number: 15895467 # Func_class: Q Secondary metabolites biosynthesis, transport and catabolism # Function: Predicted enzyme involved in methoxymalonyl-ACP biosynthesis # Organism: Clostridium acetobutylicum # 33 178 412 557 584 75 25.0 7e-14
Contig_1328_37997_18	22384-22893	0	COG:no
Contig_1328_37997_19	23036-23296	0	COG:RSc0807	COG: RSc0807 COG1942 # Protein_GI_number: 17545526 # Func_class: R General function prediction only # Function: Uncharacterized protein, 4-oxalocrotonate tautomerase homolog # Organism: Ralstonia solanacearum # 26 86 1 61 62 71 55.0 4e-13
Contig_1328_37997_26	31836-31988	0	COG:no
Contig_1328_37997_27	31975-32166	0	COG:no
Contig_1328_37997_30	36186-36413	0	COG:no
Contig_1329_2175_1	2175-03-01	0	COG:BS_pksL_2	COG: BS_pksL_2 COG3321 # Protein_GI_number: 16078781 # Func_class: Q Secondary metabolites biosynthesis, transport and catabolism # Function: Polyketide synthase modules and related proteins # Organism: Bacillus subtilis # 203 722 3 528 950 635 57.0 0
Contig_1330_73832_16	24264-24737	0	COG:no
Contig_1330_73832_31	40032-41786	0	COG:PA0032	COG: PA0032 COG0583 # Protein_GI_number: 15595230 # Func_class: K Transcription # Function: Transcriptional regulator # Organism: Pseudomonas aeruginosa # 290 579 3 295 304 215 43.0 2e-55
Contig_1330_73832_9	16146-16376	0	COG:no
Contig_1331_25166_10	13448-13687	0	COG:no
Contig_1331_25166_5	6969-7298	0	COG:no
Contig_1334_23846_18	17237-17569	0	COG:no
Contig_1334_23846_2	887-1363	0	COG:no
Contig_1334_23846_23	20438-20644	0	COG:no
Contig_1334_23846_5	3927-4364	0	COG:RSp0674	COG: RSp0674 COG4259 # Protein_GI_number: 17548895 # Func_class: S Function unknown # Function: Uncharacterized protein conserved in bacteria # Organism: Ralstonia solanacearum # 13 123 17 125 125 123 53.0 1e-28
Contig_1334_23846_8	7512-8135	0	COG:RSc0231	COG: RSc0231 COG1280 # Protein_GI_number: 17544950 # Func_class: E Amino acid transport and metabolism # Function: Putative threonine efflux protein # Organism: Ralstonia solanacearum # 1 205 1 209 211 257 73.0 8e-69
Contig_1335_15839_10	9246-10073	0	COG:no
Contig_1335_15839_11	10073-11953	0	COG:DRC0009	COG: DRC0009 COG4928 # Protein_GI_number: 10957551 # Func_class: R General function prediction only # Function: Predicted P-loop ATPase # Organism: Deinococcus radiodurans # 1 606 1 614 636 387 38.0 1e-107
Contig_1335_15839_12	12367-15042	0	COG:no
Contig_1335_15839_13	15383-15838	0	COG:no
Contig_1335_15839_5	4250-4687	0	COG:RSp0139	COG: RSp0139 COG1246 # Protein_GI_number: 17548360 # Func_class: E Amino acid transport and metabolism # Function: N-acetylglutamate synthase and related acetyltransferases # Organism: Ralstonia solanacearum # 1 141 7 145 149 69 31.0 2e-12
Contig_1335_15839_6	5304-6866	0	COG:MA2133	COG: MA2133 COG3177 # Protein_GI_number: 20090976 # Func_class: S Function unknown # Function: Uncharacterized conserved protein # Organism: Methanosarcina acetivorans str.C2A # 284 510 46 253 326 70 31.0 1e-11
Contig_1335_15839_7	6920-7252	0	COG:no
Contig_1335_15839_8	7232-7966	0	COG:DRC0006	COG: DRC0006 COG0084 # Protein_GI_number: 10957545 # Func_class: L Replication, recombination and repair # Function: Mg-dependent DNase # Organism: Deinococcus radiodurans # 1 242 1 242 244 216 45.0 2e-56
Contig_1335_15839_9	7963-9249	0	COG:no
Contig_1336_7935_4	3363-3608	0	COG:no
Contig_1337_24864_13	12627-12860	0	COG:no
Contig_1337_24864_2	676-1008	0	COG:no
Contig_1338_31245_10	7742-8242	0	COG:no
Contig_1338_31245_11	8239-8664	0	COG:no
Contig_1338_31245_13	10020-10229	0	COG:no
Contig_1338_31245_18	12294-12758	0	COG:no
Contig_1338_31245_21	15340-15522	0	COG:no
Contig_1338_31245_24	18393-18503	0	COG:no
Contig_1338_31245_30	22735-22917	0	COG:no
Contig_1338_31245_5	4653-4850	0	COG:no
Contig_1338_31245_9	7537-7758	0	COG:no
Contig_1339_93850_15	14792-16090	0	COG:SMc00424	COG: SMc00424 COG0697 # Protein_GI_number: 15964096 # Func_class: G Carbohydrate transport and metabolism; E Amino acid transport and metabolism; R General function prediction only # Function: Permeases of the drug/metabolite transporter (DMT) superfamily # Organism: Sinorhizobium meliloti # 137 431 4 298 304 294 55.0 2e-79
Contig_1339_93850_23	22925-23236	0	COG:no
Contig_1339_93850_3	1695-2012	0	COG:no
Contig_1339_93850_30	28800-29618	0	COG:no
Contig_1339_93850_31	29820-30014	0	COG:no
Contig_1339_93850_32	30036-30338	0	COG:no
Contig_1339_93850_34	30925-31179	0	COG:no
Contig_1339_93850_35	31259-32098	0	COG:no
Contig_1339_93850_36	32473-32868	0	COG:no
Contig_1339_93850_37	32996-33229	0	COG:no
Contig_1339_93850_39	34428-35030	0	COG:no
Contig_1339_93850_40	35057-35446	0	COG:no
Contig_1339_93850_41	35526-36017	0	COG:no
Contig_1339_93850_42	36014-36766	0	COG:no
Contig_1339_93850_43	37150-37419	0	COG:no
Contig_1339_93850_46	39625-39879	0	COG:no
Contig_1339_93850_48	40424-40582	0	COG:no
Contig_1339_93850_49	40667-40825	0	COG:no
Contig_1339_93850_50	40825-41052	0	COG:no
Contig_1339_93850_51	41021-41194	0	COG:no
Contig_1339_93850_52	41364-41705	0	COG:no
Contig_1339_93850_53	41702-41893	0	COG:no
Contig_1339_93850_54	42477-42722	0	COG:no
Contig_1339_93850_57	46334-46738	0	COG:no
Contig_1339_93850_60	51865-54900	0	COG:STM4269	COG: STM4269 COG0025 # Protein_GI_number: 16767519 # Func_class: P Inorganic ion transport and metabolism # Function: NhaP-type Na+/H+ and K+/H+ antiporters # Organism: Salmonella typhimurium LT2 # 457 1003 1 544 548 500 50.0 1e-141
Contig_1339_93850_65	58969-59781	0	COG:no
Contig_1339_93850_81	78228-78500	0	COG:no
Contig_1339_93850_9	9061-9552	0	COG:no
Contig_1340_41608_18	27723-28187	0	COG:no
Contig_1340_41608_6	8048-8524	0	COG:no
Contig_1342_12566_9	10941-11291	0	COG:no
Contig_1343_56237_10	10840-11241	0	COG:no
Contig_1343_56237_11	11212-11346	0	COG:no
Contig_1343_56237_13	13224-13541	0	COG:no
Contig_1343_56237_18	18900-20105	0	COG:no
Contig_1343_56237_25	27418-27777	0	COG:no
Contig_1343_56237_27	29741-30046	0	COG:no
Contig_1343_56237_42	45727-45906	0	COG:no
Contig_1344_56600_20	17662-17916	0	COG:no
Contig_1344_56600_25	23872-24228	0	COG:no
Contig_1344_56600_26	24390-24587	0	COG:no
Contig_1344_56600_27	24604-25161	0	COG:no
Contig_1344_56600_41	38858-39409	0	COG:no
Contig_1344_56600_47	49634-49864	0	COG:no
Contig_1345_69632_21	21647-21793	0	COG:no
Contig_1345_69632_27	25975-26208	0	COG:no
Contig_1345_69632_36	32021-32506	0	COG:no
Contig_1345_69632_37	32619-35825	0	COG:RSc1040	COG: RSc1040 COG1530 # Protein_GI_number: 17545759 # Func_class: J Translation, ribosomal structure and biogenesis # Function: Ribonucleases G and E # Organism: Ralstonia solanacearum # 1 704 1 735 1014 1056 75.0 0
Contig_1345_69632_45	42660-42797	0	COG:no
Contig_1345_69632_50	47840-48070	0	COG:no
Contig_1345_69632_52	48862-49563	0	COG:no
Contig_1345_69632_58	58476-58727	0	COG:msl3293	COG: msl3293 COG2261 # Protein_GI_number: 13472864 # Func_class: S Function unknown # Function: Predicted membrane protein # Organism: Mesorhizobium loti # 3 83 4 84 84 79 60.0 1e-15
Contig_1345_69632_63	63803-63949	0	COG:no
Contig_1346_27049_1	1043-1342	0	COG:no
Contig_1346_27049_12	12281-12568	0	COG:no
Contig_1346_27049_18	18279-18812	0	COG:no
Contig_1346_27049_21	22848-24137	0	COG:PA3053	COG: PA3053 COG0596 # Protein_GI_number: 15598249 # Func_class: R General function prediction only # Function: Predicted hydrolases or acyltransferases (alpha/beta hydrolase superfamily) # Organism: Pseudomonas aeruginosa # 105 415 22 332 335 455 67.0 1e-128
Contig_1346_27049_4	2960-4594	0	COG:YPO2149	COG: YPO2149 COG1741 # Protein_GI_number: 16122382 # Func_class: R General function prediction only # Function: Pirin-related protein # Organism: Yersinia pestis # 257 542 1 286 289 416 68.0 1e-116
Contig_1348_4125_3	2746-4125	0	COG:mll2848	COG: mll2848 COG5295 # Protein_GI_number: 13472521 # Func_class: U Intracellular trafficking, secretion, and vesicular transport; W Extracellular structures # Function: Autotransporter adhesin # Organism: Mesorhizobium loti # 4 177 1588 1790 1953 125 43.0 2e-28
Contig_1349_7528_1	5031-03-01	0	COG:RSc1289	COG: RSc1289 COG0532 # Protein_GI_number: 17546008 # Func_class: J Translation, ribosomal structure and biogenesis # Function: Translation initiation factor 2 (IF-2; GTPase) # Organism: Ralstonia solanacearum # 240 839 231 827 964 852 77.0 0
Contig_1349_7528_4	7361-7528	0	COG:no
Contig_1353_23624_1	2-1568	0	COG:MTH1745	COG: MTH1745 COG0526 # Protein_GI_number: 15679737 # Func_class: O Posttranslational modification, protein turnover, chaperones; C Energy production and conversion # Function: Thiol-disulfide isomerase and thioredoxins # Organism: Methanothermobacter thermautotrophicus # 44 142 52 149 150 63 34.0 1e-09
Contig_1354_101990_17	18034-18174	0	COG:no
Contig_1354_101990_3	1832-2212	0	COG:no
Contig_1354_101990_66	71147-71365	0	COG:no
Contig_1354_101990_67	71504-71932	0	COG:no
Contig_1354_101990_68	71938-72192	0	COG:no
Contig_1354_101990_69	72677-72856	0	COG:no
Contig_1354_101990_7	4523-4996	0	COG:no
Contig_1354_101990_70	72908-74326	0	COG:no
Contig_1354_101990_71	74371-76788	0	COG:no
Contig_1354_101990_72	76813-77040	0	COG:no
Contig_1354_101990_73	77037-77714	0	COG:no
Contig_1354_101990_74	77714-78385	0	COG:no
Contig_1354_101990_75	78389-78640	0	COG:no
Contig_1354_101990_76	79143-79307	0	COG:no
Contig_1354_101990_77	79356-79544	0	COG:no
Contig_1354_101990_78	79680-80225	0	COG:mlr5477	COG: mlr5477 COG3728 # Protein_GI_number: 13474568 # Func_class: L Replication, recombination and repair # Function: Phage terminase, small subunit # Organism: Mesorhizobium loti # 4 157 3 158 199 114 40.0 1e-25
Contig_1354_101990_79	80444-82708	0	COG:XF0506	COG: XF0506 COG5545 # Protein_GI_number: 15837108 # Func_class: R General function prediction only # Function: Predicted P-loop ATPase and inactivated derivatives # Organism: Xylella fastidiosa 9a5c # 354 728 38 429 488 125 28.0 2e-28
Contig_1354_101990_80	82745-83362	0	COG:no
Contig_1354_101990_92	97536-97766	0	COG:no
Contig_1354_101990_93	97947-99287	0	COG:CAC1764	COG: CAC1764 COG2071 # Protein_GI_number: 15895041 # Func_class: R General function prediction only # Function: Predicted glutamine amidotransferases # Organism: Clostridium acetobutylicum # 252 445 49 239 241 133 37.0 6e-31
Contig_1355_46989_12	11165-14371	0	COG:RSc1040	COG: RSc1040 COG1530 # Protein_GI_number: 17545759 # Func_class: J Translation, ribosomal structure and biogenesis # Function: Ribonucleases G and E # Organism: Ralstonia solanacearum # 1 704 1 735 1014 1056 75.0 0
Contig_1355_46989_13	14484-14969	0	COG:no
Contig_1355_46989_22	20782-21015	0	COG:no
Contig_1355_46989_28	25197-25343	0	COG:no
Contig_1356_40678_18	15951-16289	0	COG:no
Contig_1356_40678_31	29714-30007	0	COG:no
Contig_1356_40678_32	30285-30467	0	COG:no
Contig_1356_40678_6	4454-4594	0	COG:no
Contig_1356_40678_8	6232-6426	0	COG:no
Contig_1357_10703_1	1-190	0	COG:no
Contig_1357_10703_6	5616-5855	0	COG:no
Contig_1357_10703_7	6241-6954	0	COG:no
Contig_1357_10703_8	6881-9130	0	COG:STM3619	COG: STM3619 COG1215 # Protein_GI_number: 16766905 # Func_class: M Cell wall/membrane/envelope biogenesis # Function: Glycosyltransferases, probably involved in cell wall biogenesis # Organism: Salmonella typhimurium LT2 # 27 569 213 780 874 296 35.0 8e-80
Contig_1358_36815_14	17716-18510	0	COG:no
Contig_1358_36815_17	22632-23171	0	COG:ZintH	COG: ZintH COG0582 # Protein_GI_number: 15799949 # Func_class: L Replication, recombination and repair # Function: Integrase # Organism: Escherichia coli O157:H7 EDL933 # 120 179 221 283 324 73 53.0 3e-13
Contig_1359_47849_14	19138-19650	0	COG:no
Contig_1359_47849_18	22474-22920	0	COG:AGc4216	COG: AGc4216 COG1304 # Protein_GI_number: 15889595 # Func_class: C Energy production and conversion # Function: L-lactate dehydrogenase (FMN-dependent) and related alpha-hydroxy acid dehydrogenases # Organism: Agrobacterium tumefaciens strain C58 (Cereon) # 1 107 223 329 382 154 66.0 7e-38
Contig_1359_47849_22	27155-27430	0	COG:PA2220	COG: PA2220 COG0583 # Protein_GI_number: 15597416 # Func_class: K Transcription # Function: Transcriptional regulator # Organism: Pseudomonas aeruginosa # 1 83 215 297 306 106 57.0 9e-24
Contig_1359_47849_35	44845-47352	0	COG:DRA0335_1	COG: DRA0335_1 COG0515 # Protein_GI_number: 15808039 # Func_class: R General function prediction only; T Signal transduction mechanisms; K Transcription; L Replication, recombination and repair # Function: Serine/threonine protein kinase # Organism: Deinococcus radiodurans # 34 310 10 276 459 174 37.0 1e-42
Contig_1359_47849_36	47405-47849	0	COG:PA0082	COG: PA0082 COG3515 # Protein_GI_number: 15595280 # Func_class: S Function unknown # Function: Uncharacterized protein conserved in bacteria # Organism: Pseudomonas aeruginosa # 7 131 4 128 344 105 52.0 3e-23
Contig_1360_19869_16	15704-15916	0	COG:no
Contig_1360_19869_17	16157-16300	0	COG:no
Contig_1360_19869_3	2063-3229	0	COG:all2585	COG: all2585 COG0609 # Protein_GI_number: 17230077 # Func_class: P Inorganic ion transport and metabolism # Function: ABC-type Fe3+-siderophore transport system, permease component # Organism: Nostoc sp. PCC 7120 # 63 348 58 343 346 117 33.0 3e-26
Contig_1360_19869_6	5239-5487	0	COG:PA2412	COG: PA2412 COG3251 # Protein_GI_number: 15597608 # Func_class: S Function unknown # Function: Uncharacterized protein conserved in bacteria # Organism: Pseudomonas aeruginosa # 15 79 6 70 72 95 61.0 3e-20
Contig_1361_7693_11	7202-7691	0	COG:RSp0874	COG: RSp0874 COG1450 # Protein_GI_number: 17549095 # Func_class: N Cell motility; U Intracellular trafficking, secretion, and vesicular transport # Function: Type II secretory pathway, component PulD # Organism: Ralstonia solanacearum # 25 159 15 149 568 74 32.0 9e-14
Contig_1361_7693_5	1952-2095	0	COG:no
Contig_1364_31974_13	16928-17245	0	COG:no
Contig_1364_31974_2	597-1223	0	COG:no
Contig_1366_6650_1	3430-02-01	0	COG:BS_pksR_1	COG: BS_pksR_1 COG3321 # Protein_GI_number: 16078785 # Func_class: Q Secondary metabolites biosynthesis, transport and catabolism # Function: Polyketide synthase modules and related proteins # Organism: Bacillus subtilis # 6 917 67 959 1520 486 31.0 1e-136
Contig_1367_11123_1	285-797	0	COG:no
Contig_1367_11123_7	8813-9043	0	COG:no
Contig_1368_19756_11	9574-10452	0	COG:PA2310	COG: PA2310 COG2175 # Protein_GI_number: 15597506 # Func_class: Q Secondary metabolites biosynthesis, transport and catabolism # Function: Probable taurine catabolism dioxygenase # Organism: Pseudomonas aeruginosa # 13 287 18 292 295 169 35.0 7e-42
Contig_1368_19756_4	3705-3902	0	COG:no
Contig_1368_19756_5	4167-4385	0	COG:no
Contig_1368_19756_7	5666-6127	0	COG:no
Contig_1368_19756_8	6292-7017	0	COG:SMb20104	COG: SMb20104 COG0730 # Protein_GI_number: 16263852 # Func_class: R General function prediction only # Function: Predicted permeases # Organism: Sinorhizobium meliloti # 1 237 1 238 252 68 27.0 1e-11
Contig_1369_84642_22	24195-24722	0	COG:no
Contig_1369_84642_36	39320-39880	0	COG:PA1352	COG: PA1352 COG0477 # Protein_GI_number: 15596549 # Func_class: G Carbohydrate transport and metabolism; E Amino acid transport and metabolism; P Inorganic ion transport and metabolism; R General function prediction only # Function: Permeases of the major facilitator superfamily # Organism: Pseudomonas aeruginosa # 16 86 209 279 403 63 69.0 1e-10
Contig_1369_84642_51	55251-55718	0	COG:no
Contig_1369_84642_62	67265-67528	0	COG:no
Contig_1369_84642_69	74303-74566	0	COG:no
Contig_1369_84642_72	76787-76948	0	COG:no
Contig_1370_4393_2	700-975	0	COG:no
Contig_1370_4393_3	1131-1445	0	COG:no
Contig_1371_31974_22	23876-24205	0	COG:no
Contig_1371_31974_23	24464-25837	0	COG:NMB1290	COG: NMB1290 COG0270 # Protein_GI_number: 15677157 # Func_class: L Replication, recombination and repair # Function: Site-specific DNA methylase # Organism: Neisseria meningitidis MC58 # 7 205 20 227 337 153 40.0 8e-37
Contig_1371_31974_24	25834-27423	0	COG:no
Contig_1371_31974_25	27420-29660	0	COG:no
Contig_1371_31974_26	30147-30620	0	COG:no
Contig_1371_31974_27	30774-31214	0	COG:SMc03764	COG: SMc03764 COG3727 # Protein_GI_number: 15966902 # Func_class: L Replication, recombination and repair # Function: DNA G:T-mismatch repair endonuclease # Organism: Sinorhizobium meliloti # 22 129 11 119 145 127 52.0 6e-30
Contig_1371_31974_28	31352-31612	0	COG:no
Contig_1372_30241_10	9742-10299	0	COG:no
Contig_1372_30241_12	11086-11283	0	COG:no
Contig_1372_30241_16	14229-14708	0	COG:no
Contig_1372_30241_20	17469-17840	0	COG:no
Contig_1372_30241_21	17737-17934	0	COG:no
Contig_1372_30241_22	18356-18736	0	COG:no
Contig_1372_30241_26	21282-22112	0	COG:no
Contig_1372_30241_27	21678-22472	0	COG:no
Contig_1372_30241_28	22701-23186	0	COG:no
Contig_1372_30241_29	24294-25394	0	COG:alr1113	COG: alr1113 COG1192 # Protein_GI_number: 17228608 # Func_class: D Cell cycle control, cell division, chromosome partitioning # Function: ATPases involved in chromosome partitioning # Organism: Nostoc sp. PCC 7120 # 1 295 171 424 460 71 25.0 3e-12
Contig_1372_30241_30	25399-26088	0	COG:FN0926	COG: FN0926 COG2357 # Protein_GI_number: 19704261 # Func_class: S Function unknown # Function: Uncharacterized protein conserved in bacteria # Organism: Fusobacterium nucleatum # 43 218 61 231 259 80 30.0 2e-15
Contig_1372_30241_32	27336-28436	0	COG:RSp0266	COG: RSp0266 COG4861 # Protein_GI_number: 17548487 # Func_class: S Function unknown # Function: Uncharacterized protein conserved in bacteria # Organism: Ralstonia solanacearum # 97 359 101 365 370 138 36.0 1e-32
Contig_1372_30241_33	28405-29346	0	COG:RSp0267	COG: RSp0267 COG4849 # Protein_GI_number: 17548488 # Func_class: S Function unknown # Function: Uncharacterized protein conserved in bacteria # Organism: Ralstonia solanacearum # 10 297 6 286 287 151 34.0 1e-36
Contig_1372_30241_34	29785-30240	0	COG:no
Contig_1373_55710_15	17694-17888	0	COG:no
Contig_1373_55710_23	25767-26021	0	COG:no
Contig_1373_55710_28	31392-31694	0	COG:no
Contig_1373_55710_33	37098-37217	0	COG:no
Contig_1373_55710_4	4357-4605	0	COG:no
Contig_1373_55710_47	50242-50397	0	COG:no
Contig_1375_2731_1	2-797	0	COG:no
Contig_1376_29528_13	18308-18643	0	COG:no
Contig_1376_29528_15	19154-19627	0	COG:no
Contig_1376_29528_18	22574-22726	0	COG:no
Contig_1376_29528_22	27211-28101	0	COG:mll2784	COG: mll2784 COG0583 # Protein_GI_number: 13472475 # Func_class: K Transcription # Function: Transcriptional regulator # Organism: Mesorhizobium loti # 1 292 1 291 307 344 58.0 1e-94
Contig_1377_59037_24	18738-19163	0	COG:no
Contig_1377_59037_27	20209-20673	0	COG:no
Contig_1377_59037_3	1978-2178	0	COG:no
Contig_1377_59037_6	4707-5183	0	COG:no
Contig_1377_59037_7	5202-5681	0	COG:no
Contig_1378_33438_21	22664-22861	0	COG:no
Contig_1378_33438_25	24864-25103	0	COG:no
Contig_1379_43937_19	24233-24979	0	COG:no
Contig_1379_43937_20	25018-25470	0	COG:no
Contig_1379_43937_21	26384-26581	0	COG:no
Contig_1379_43937_23	29076-29345	0	COG:no
Contig_1379_43937_25	31543-31767	0	COG:no
Contig_1379_43937_28	34044-34616	0	COG:no
Contig_1379_43937_30	35372-35884	0	COG:no
Contig_1379_43937_32	36629-37102	0	COG:no
Contig_1379_43937_34	38504-38689	0	COG:no
Contig_1379_43937_38	42272-42439	0	COG:no
Contig_1380_9637_1	2569-02-01	0	COG:PA1662	COG: PA1662 COG0542 # Protein_GI_number: 15596859 # Func_class: O Posttranslational modification, protein turnover, chaperones # Function: ATPases with chaperone activity, ATP-binding subunit # Organism: Pseudomonas aeruginosa # 1 787 97 850 877 741 52.0 0
Contig_1380_9637_3	5672-8299	0	COG:MA3328	COG: MA3328 COG1357 # Protein_GI_number: 20092142 # Func_class: S Function unknown # Function: Uncharacterized low-complexity proteins # Organism: Methanosarcina acetivorans str.C2A # 583 859 5 250 299 111 33.0 7e-24
Contig_138_18585_12	11179-11478	0	COG:no
Contig_1382_103287_27	27890-28117	0	COG:no
Contig_1382_103287_31	31084-31602	0	COG:no
Contig_1382_103287_39	38532-39248	0	COG:no
Contig_1382_103287_48	48196-48375	0	COG:no
Contig_1382_103287_53	53074-53559	0	COG:RSc2896	COG: RSc2896 COG0741 # Protein_GI_number: 17547615 # Func_class: M Cell wall/membrane/envelope biogenesis # Function: Soluble lytic murein transglycosylase and related regulatory proteins (some contain LysM/invasin domains) # Organism: Ralstonia solanacearum # 19 147 40 169 170 155 53.0 3e-38
Contig_1382_103287_6	6033-6191	0	COG:no
Contig_1382_103287_67	67702-67830	0	COG:no
Contig_1382_103287_72	71766-72215	0	COG:BMEI1597	COG: BMEI1597 COG1380 # Protein_GI_number: 17987880 # Func_class: R General function prediction only # Function: Putative effector of murein hydrolase LrgA # Organism: Brucella melitensis # 23 136 2 115 117 85 42.0 3e-17
Contig_1382_103287_74	73040-73513	0	COG:no
Contig_1382_103287_77	75117-75614	0	COG:RSp0377	COG: RSp0377 COG1886 # Protein_GI_number: 17548598 # Func_class: N Cell motility; U Intracellular trafficking, secretion, and vesicular transport # Function: Flagellar motor switch/type III secretory pathway protein # Organism: Ralstonia solanacearum # 64 165 52 156 156 170 80.0 1e-42
Contig_1382_103287_78	75611-76288	0	COG:YPO1821	COG: YPO1821 COG3190 # Protein_GI_number: 16122074 # Func_class: N Cell motility # Function: Flagellar biogenesis protein # Organism: Yersinia pestis # 103 159 25 82 122 63 55.0 3e-10
Contig_1382_103287_82	78447-79304	0	COG:PA5116	COG: PA5116 COG0789 # Protein_GI_number: 15600309 # Func_class: K Transcription # Function: Predicted transcriptional regulators # Organism: Pseudomonas aeruginosa # 145 262 3 120 141 172 77.0 8e-43
Contig_1382_103287_90	86368-86586	0	COG:no
Contig_1382_103287_94	93689-93871	0	COG:no
Contig_1383_62434_16	17359-17988	0	COG:RSp1501	COG: RSp1501 COG1999 # Protein_GI_number: 17549720 # Func_class: R General function prediction only # Function: Uncharacterized protein SCO1/SenC/PrrC, involved in biogenesis of respiratory and photosynthetic systems # Organism: Ralstonia solanacearum # 49 209 33 193 194 228 67.0 7e-60
Contig_1383_62434_22	22215-24404	0	COG:YPO3840	COG: YPO3840 COG1309 # Protein_GI_number: 16123975 # Func_class: K Transcription # Function: Transcriptional regulator # Organism: Yersinia pestis # 429 629 13 222 228 202 50.0 3e-51
Contig_1383_62434_30	33002-33346	0	COG:no
Contig_1384_7242_2	438-1655	0	COG:SA1341	COG: SA1341 COG0477 # Protein_GI_number: 15927091 # Func_class: G Carbohydrate transport and metabolism; E Amino acid transport and metabolism; P Inorganic ion transport and metabolism; R General function prediction only # Function: Permeases of the major facilitator superfamily # Organism: Staphylococcus aureus N315 # 28 370 32 375 405 92 22.0 1e-18
Contig_1385_10762_6	9121-9840	0	COG:no
Contig_1385_10762_7	9976-10215	0	COG:Z3161	COG: Z3161 COG2963 # Protein_GI_number: 15802479 # Func_class: L Replication, recombination and repair # Function: Transposase and inactivated derivatives # Organism: Escherichia coli O157:H7 EDL933 # 2 78 30 107 108 95 60.0 3e-20
Contig_1385_10762_8	10272-10761	0	COG:Z1660	COG: Z1660 COG2801 # Protein_GI_number: 15801145 # Func_class: L Replication, recombination and repair # Function: Transposase and inactivated derivatives # Organism: Escherichia coli O157:H7 EDL933 # 1 163 20 181 295 209 65.0 2e-54
Contig_1388_134489_111	124464-124967	0	COG:no
Contig_1388_134489_2	553-1158	0	COG:no
Contig_1388_134489_23	29285-29497	0	COG:no
Contig_1388_134489_32	40857-41309	0	COG:no
Contig_1388_134489_44	52414-53385	0	COG:PM1614	COG: PM1614 COG0739 # Protein_GI_number: 15603479 # Func_class: M Cell wall/membrane/envelope biogenesis # Function: Membrane proteins related to metalloendopeptidases # Organism: Pasteurella multocida # 73 320 215 467 467 158 35.0 2e-38
Contig_1388_134489_67	80870-81139	0	COG:no
Contig_1388_134489_9	7573-8046	0	COG:no
Contig_1390_3221_1	3221-02-01	0	COG:BS_pksL_2	COG: BS_pksL_2 COG3321 # Protein_GI_number: 16078781 # Func_class: Q Secondary metabolites biosynthesis, transport and catabolism # Function: Polyketide synthase modules and related proteins # Organism: Bacillus subtilis # 77 689 3 609 950 697 54.0 0
Contig_1391_114927_12	12305-13141	0	COG:RSc3132	COG: RSc3132 COG1396 # Protein_GI_number: 17547851 # Func_class: K Transcription # Function: Predicted transcriptional regulators # Organism: Ralstonia solanacearum # 3 185 16 202 209 206 60.0 5e-53
Contig_1391_114927_2	994-1539	0	COG:no
Contig_1391_114927_34	41451-42431	0	COG:PA3898	COG: PA3898 COG2207 # Protein_GI_number: 15599093 # Func_class: K Transcription # Function: AraC-type DNA-binding domain-containing proteins # Organism: Pseudomonas aeruginosa # 40 323 9 293 293 259 49.0 5e-69
Contig_1391_114927_56	64774-65373	0	COG:no
Contig_1391_114927_58	66155-66547	0	COG:no
Contig_1391_114927_62	69354-69542	0	COG:no
Contig_1391_114927_67	72132-73136	0	COG:no
Contig_1391_114927_76	80772-81272	0	COG:no
Contig_1391_114927_78	81796-82287	0	COG:no
Contig_1391_114927_93	97401-97682	0	COG:no
Contig_1391_114927_94	97658-97936	0	COG:no
Contig_1392_43633_12	13258-13476	0	COG:no
Contig_1392_43633_15	17565-17867	0	COG:no
Contig_1392_43633_16	18018-18194	0	COG:no
Contig_1392_43633_31	36339-36524	0	COG:no
Contig_1392_43633_6	6722-7207	0	COG:no
Contig_1394_24695_1	78-515	0	COG:no
Contig_1394_24695_2	557-799	0	COG:no
Contig_1394_24695_24	24084-24410	0	COG:no
Contig_1394_24695_25	24439-24694	0	COG:no
Contig_1394_24695_3	1113-1946	0	COG:no
Contig_1394_24695_4	3375-3950	0	COG:no
Contig_1394_24695_5	4167-4478	0	COG:STM2748	COG: STM2748 COG1396 # Protein_GI_number: 16766060 # Func_class: K Transcription # Function: Predicted transcriptional regulators # Organism: Salmonella typhimurium LT2 # 1 84 23 106 118 86 48.0 1e-17
Contig_1394_24695_6	4485-6209	0	COG:RSc1554	COG: RSc1554 COG0582 # Protein_GI_number: 17546273 # Func_class: L Replication, recombination and repair # Function: Integrase # Organism: Ralstonia solanacearum # 162 470 84 354 354 114 30.0 4e-25
Contig_1394_24695_8	7415-7621	0	SUPPORTED	NR: gi|167580496|ref|ZP_02373370.1| 50S ribosomal protein L21 [Burkholderia thailandensis TXDOH] # 1 68 1 68 68 135 100 3e-31
Contig_1395_20264_1	541-720	0	COG:no
Contig_1395_20264_10	6573-7430	0	COG:no
Contig_1395_20264_11	7441-7659	0	COG:no
Contig_1395_20264_12	7753-9603	0	COG:mlr1445	COG: mlr1445 COG0433 # Protein_GI_number: 13471466 # Func_class: R General function prediction only # Function: Predicted ATPase # Organism: Mesorhizobium loti # 39 586 49 524 610 162 25.0 1e-39
Contig_1395_20264_13	9605-10768	0	COG:no
Contig_1395_20264_14	10906-11007	0	COG:no
Contig_1395_20264_16	12071-12808	0	COG:no
Contig_1395_20264_2	1095-1277	0	COG:no
Contig_1395_20264_4	4377-4799	0	COG:no
Contig_1395_20264_5	4810-5154	0	COG:no
Contig_1395_20264_6	5151-5396	0	COG:no
Contig_1395_20264_7	5389-5565	0	COG:no
Contig_1395_20264_8	5916-6191	0	COG:no
Contig_1395_20264_9	6191-6454	0	COG:no
Contig_1396_11071_1	404-586	0	COG:no
Contig_1396_11071_2	820-1689	0	COG:no
Contig_1396_11071_3	1696-2517	0	COG:no
Contig_1396_11071_4	2528-2710	0	COG:no
Contig_1396_11071_5	3901-4728	0	COG:no
Contig_1396_11071_6	4725-4919	0	COG:no
Contig_1397_24345_16	15125-15424	0	COG:PA0518	COG: PA0518 COG4654 # Protein_GI_number: 15595715 # Func_class: C Energy production and conversion # Function: Cytochrome c551/c552 # Organism: Pseudomonas aeruginosa # 18 99 24 104 104 83 48.0 8e-17
Contig_1398_73473_49	51295-51435	0	COG:no
Contig_1398_73473_5	3426-3653	0	COG:no
Contig_1398_73473_62	60938-61156	0	COG:no
Contig_1398_73473_7	3934-4725	0	COG:RSc0323	COG: RSc0323 COG0321 # Protein_GI_number: 17545042 # Func_class: H Coenzyme transport and metabolism # Function: Lipoate-protein ligase B # Organism: Ralstonia solanacearum # 39 244 2 215 229 269 66.0 4e-72
Contig_1400_10004_1	3-566	0	COG:no
Contig_1402_14027_2	1204-2604	0	COG:no
Contig_1402_14027_9	9396-9614	0	COG:no
Contig_1403_10738_1	197-2731	0	COG:all2952	COG: all2952 COG0744 # Protein_GI_number: 17230444 # Func_class: M Cell wall/membrane/envelope biogenesis # Function: Membrane carboxypeptidase (penicillin-binding protein) # Organism: Nostoc sp. PCC 7120 # 53 691 50 613 755 285 34.0 2e-76
Contig_1403_10738_4	5928-6413	0	COG:no
Contig_1403_10738_6	7545-8966	0	COG:PAE2336	COG: PAE2336 COG0778 # Protein_GI_number: 18313271 # Func_class: C Energy production and conversion # Function: Nitroreductase # Organism: Pyrobaculum aerophilum # 284 470 52 255 274 83 32.0 1e-15
Contig_1405_16865_12	14168-14386	0	COG:no
Contig_1411_37967_20	34350-34850	0	COG:no
Contig_1411_37967_5	6009-6467	0	COG:no
Contig_1412_27853_16	17068-17607	0	COG:no
Contig_1413_15811_5	6128-6748	0	COG:no
Contig_1414_17026_17	13552-13848	0	COG:no
Contig_1414_17026_18	14030-14467	0	COG:no
Contig_1414_17026_5	1765-2232	0	COG:no
Contig_1414_17026_6	2598-3158	0	COG:no
Contig_1414_17026_7	3255-3647	0	COG:no
Contig_1414_17026_8	3772-3966	0	COG:no
Contig_1414_17026_9	4053-4205	0	COG:no
Contig_1416_2471_2	1086-1985	0	COG:no
Contig_1417_45185_1	2-491	0	COG:Z1660	COG: Z1660 COG2801 # Protein_GI_number: 15801145 # Func_class: L Replication, recombination and repair # Function: Transposase and inactivated derivatives # Organism: Escherichia coli O157:H7 EDL933 # 1 163 20 181 295 209 65.0 2e-54
Contig_1417_45185_10	6398-7003	0	COG:no
Contig_1417_45185_11	7000-7335	0	COG:no
Contig_1417_45185_12	7387-7605	0	COG:no
Contig_1417_45185_13	7659-7790	0	COG:no
Contig_1417_45185_14	7734-8189	0	COG:no
Contig_1417_45185_15	8137-8487	0	COG:no
Contig_1417_45185_16	8906-9109	0	COG:no
Contig_1417_45185_17	9087-9614	0	COG:no
Contig_1417_45185_18	9592-9960	0	COG:no
Contig_1417_45185_19	9968-10423	0	COG:no
Contig_1417_45185_2	548-874	0	COG:Z3161	COG: Z3161 COG2963 # Protein_GI_number: 15802479 # Func_class: L Replication, recombination and repair # Function: Transposase and inactivated derivatives # Organism: Escherichia coli O157:H7 EDL933 # 4 107 3 107 108 124 59.0 3e-29
Contig_1417_45185_20	10425-10883	0	COG:no
Contig_1417_45185_21	11221-11727	0	COG:no
Contig_1417_45185_22	11849-14341	0	COG:XF2121	COG: XF2121 COG5545 # Protein_GI_number: 15838712 # Func_class: R General function prediction only # Function: Predicted P-loop ATPase and inactivated derivatives # Organism: Xylella fastidiosa 9a5c # 423 810 32 463 501 227 34.0 9e-59
Contig_1417_45185_23	14559-15332	0	COG:no
Contig_1417_45185_24	15552-15740	0	COG:no
Contig_1417_45185_25	15834-16403	0	COG:no
Contig_1417_45185_26	16366-18354	0	COG:XF2500	COG: XF2500 COG5525 # Protein_GI_number: 15839090 # Func_class: R General function prediction only # Function: Bacteriophage tail assembly protein # Organism: Xylella fastidiosa 9a5c # 29 580 2 530 580 262 33.0 1e-69
Contig_1417_45185_27	18365-18571	0	COG:no
Contig_1417_45185_28	18730-20061	0	COG:RSc0857	COG: RSc0857 COG5511 # Protein_GI_number: 17545576 # Func_class: R General function prediction only # Function: Bacteriophage capsid protein # Organism: Ralstonia solanacearum # 1 426 56 482 508 355 45.0 7e-98
Contig_1417_45185_29	20058-21125	0	COG:ECs2960_1	COG: ECs2960_1 COG0740 # Protein_GI_number: 15832214 # Func_class: O Posttranslational modification, protein turnover, chaperones; U Intracellular trafficking, secretion, and vesicular transport # Function: Protease subunit of ATP-dependent Clp proteases # Organism: Escherichia coli O157:H7 # 3 186 66 244 244 159 42.0 6e-39
Contig_1417_45185_30	21153-21497	0	COG:no
Contig_1417_45185_31	21532-22557	0	COG:no
Contig_1417_45185_32	22561-22851	0	COG:no
Contig_1417_45185_33	22853-23383	0	COG:no
Contig_1417_45185_34	23373-23906	0	COG:no
Contig_1417_45185_35	23909-24589	0	COG:PA0616	COG: PA0616 COG4540 # Protein_GI_number: 15595813 # Func_class: R General function prediction only # Function: Phage P2 baseplate assembly protein gpV # Organism: Pseudomonas aeruginosa # 2 197 1 182 185 108 36.0 8e-24
Contig_1417_45185_36	24653-24859	0	COG:no
Contig_1417_45185_39	26083-26658	0	COG:PA0619	COG: PA0619 COG4385 # Protein_GI_number: 15595816 # Func_class: R General function prediction only # Function: Bacteriophage P2-related tail formation protein # Organism: Pseudomonas aeruginosa # 1 93 1 92 177 74 46.0 8e-14
Contig_1417_45185_4	2296-3144	0	COG:RSc1554	COG: RSc1554 COG0582 # Protein_GI_number: 17546273 # Func_class: L Replication, recombination and repair # Function: Integrase # Organism: Ralstonia solanacearum # 113 273 204 352 354 84 33.0 3e-16
Contig_1417_45185_40	26646-28109	0	COG:STM2706	COG: STM2706 COG5301 # Protein_GI_number: 16766019 # Func_class: R General function prediction only # Function: Phage-related tail fibre protein # Organism: Salmonella typhimurium LT2 # 44 115 162 259 524 70 41.0 7e-12
Contig_1417_45185_41	28125-28577	0	COG:no
Contig_1417_45185_43	29824-30327	0	COG:PA0623	COG: PA0623 COG3498 # Protein_GI_number: 15595820 # Func_class: R General function prediction only # Function: Phage tail tube protein FII # Organism: Pseudomonas aeruginosa # 1 167 1 167 167 184 52.0 8e-47
Contig_1417_45185_44	30397-30699	0	COG:no
Contig_1417_45185_45	30787-33195	0	COG:PA0625	COG: PA0625 COG3941 # Protein_GI_number: 15595822 # Func_class: R General function prediction only # Function: Mu-like prophage protein # Organism: Pseudomonas aeruginosa # 1 798 1 741 745 224 29.0 6e-58
Contig_1417_45185_46	33204-34085	0	COG:PA0626_2	COG: PA0626_2 COG3499 # Protein_GI_number: 15595823 # Func_class: R General function prediction only # Function: Phage protein U # Organism: Pseudomonas aeruginosa # 171 292 1 131 132 113 48.0 5e-25
Contig_1417_45185_47	34060-34266	0	COG:PA0627	COG: PA0627 COG5004 # Protein_GI_number: 15595824 # Func_class: R General function prediction only # Function: P2-like prophage tail protein X # Organism: Pseudomonas aeruginosa # 1 67 1 67 68 85 58.0 3e-17
Contig_1417_45185_5	3178-3408	0	COG:no
Contig_1417_45185_53	37836-38021	0	COG:no
Contig_1417_45185_54	38055-38414	0	COG:no
Contig_1417_45185_6	3396-4184	0	COG:no
Contig_1417_45185_7	4193-4639	0	COG:no
Contig_1417_45185_8	4636-5952	0	COG:no
Contig_1417_45185_9	5952-6392	0	COG:no
Contig_1418_1437_1	1-231	0	COG:Z3161	COG: Z3161 COG2963 # Protein_GI_number: 15802479 # Func_class: L Replication, recombination and repair # Function: Transposase and inactivated derivatives # Organism: Escherichia coli O157:H7 EDL933 # 1 75 32 107 108 90 59.0 1e-18
Contig_1418_1437_2	450-1142	0	COG:Z1957	COG: Z1957 COG2801 # Protein_GI_number: 15801416 # Func_class: L Replication, recombination and repair # Function: Transposase and inactivated derivatives # Organism: Escherichia coli O157:H7 EDL933 # 3 228 77 296 296 295 67.0 4e-80
Contig_1420_1217_3	937-1216	0	COG:RSp0738_2	COG: RSp0738_2 COG4253 # Protein_GI_number: 17548959 # Func_class: S Function unknown # Function: Uncharacterized protein conserved in bacteria # Organism: Ralstonia solanacearum # 2 93 10 95 289 61 40.0 4e-10
Contig_1421_97574_15	17239-17538	0	COG:no
Contig_1421_97574_18	20425-20982	0	COG:no
Contig_1421_97574_41	47403-47756	0	COG:no
Contig_1421_97574_50	72467-72706	0	COG:no
Contig_1421_97574_51	72785-72976	0	COG:no
Contig_1421_97574_65	85369-85707	0	COG:no
Contig_1422_105208_10	11187-11924	0	COG:RSc0462	COG: RSc0462 COG0500 # Protein_GI_number: 17545181 # Func_class: Q Secondary metabolites biosynthesis, transport and catabolism; R General function prediction only # Function: SAM-dependent methyltransferases # Organism: Ralstonia solanacearum # 52 244 7 206 209 198 56.0 9e-51
Contig_1422_105208_11	12015-12353	0	COG:RSc0464	COG: RSc0464 COG2331 # Protein_GI_number: 17545183 # Func_class: S Function unknown # Function: Uncharacterized protein conserved in bacteria # Organism: Ralstonia solanacearum # 1 67 1 67 112 126 83.0 9e-30
Contig_1422_105208_31	36626-38305	0	COG:RSc0519	COG: RSc0519 COG0697 # Protein_GI_number: 17545238 # Func_class: G Carbohydrate transport and metabolism; E Amino acid transport and metabolism; R General function prediction only # Function: Permeases of the drug/metabolite transporter (DMT) superfamily # Organism: Ralstonia solanacearum # 250 551 2 299 301 333 59.0 6e-91
Contig_1422_105208_37	43828-44037	0	COG:no
Contig_1422_105208_6	7631-7750	0	COG:no
Contig_1422_105208_63	73996-74343	0	COG:RSc3305	COG: RSc3305 COG3791 # Protein_GI_number: 17548022 # Func_class: S Function unknown # Function: Uncharacterized conserved protein # Organism: Ralstonia solanacearum # 1 114 1 114 115 162 62.0 1e-40
Contig_1422_105208_67	80009-80602	0	COG:no
Contig_1422_105208_71	86798-86992	0	COG:no
Contig_1422_105208_81	103930-104160	0	COG:no
Contig_1423_16487_10	5271-7355	0	COG:no
Contig_1423_16487_12	8415-8768	0	COG:no
Contig_1423_16487_15	11819-13027	0	COG:MA2103	COG: MA2103 COG0732 # Protein_GI_number: 20090947 # Func_class: V Defense mechanisms # Function: Restriction endonuclease S subunits # Organism: Methanosarcina acetivorans str.C2A # 124 401 18 287 290 174 36.0 3e-43
Contig_1423_16487_16	13024-16167	0	COG:MTH940	COG: MTH940 COG0610 # Protein_GI_number: 15678960 # Func_class: V Defense mechanisms # Function: Type I site-specific restriction-modification system, R (restriction) subunit and related helicases # Organism: Methanothermobacter thermautotrophicus # 41 973 17 985 1013 417 30.0 1e-116
Contig_1423_16487_17	16031-16486	0	COG:no
Contig_1423_16487_2	1943-2269	0	COG:no
Contig_1423_16487_3	2279-2626	0	COG:no
Contig_1423_16487_4	2619-2831	0	COG:no
Contig_1423_16487_5	2824-3126	0	COG:no
Contig_1423_16487_6	3119-3295	0	COG:no
Contig_1423_16487_7	3656-3958	0	COG:no
Contig_1423_16487_9	4288-4821	0	COG:no
Contig_1424_209655_101	107683-107988	0	COG:no
Contig_1424_209655_117	126324-126791	0	COG:no
Contig_1424_209655_120	129503-132226	0	COG:YPO4034_1	COG: YPO4034_1 COG1609 # Protein_GI_number: 16124154 # Func_class: K Transcription # Function: Transcriptional regulators # Organism: Yersinia pestis # 521 770 6 254 265 275 50.0 4e-73
Contig_1424_209655_128	141214-141534	0	COG:mll9055	COG: mll9055 COG3316 # Protein_GI_number: 13488059 # Func_class: L Replication, recombination and repair # Function: Transposase and inactivated derivatives # Organism: Mesorhizobium loti # 42 106 8 72 185 73 47.0 8e-14
Contig_1424_209655_129	141675-141887	0	COG:no
Contig_1424_209655_13	10867-11049	0	COG:no
Contig_1424_209655_130	141801-141986	0	COG:no
Contig_1424_209655_131	142160-142456	0	COG:no
Contig_1424_209655_132	142489-142605	0	COG:no
Contig_1424_209655_133	142727-144313	0	COG:Cgl2906	COG: Cgl2906 COG2132 # Protein_GI_number: 19554156 # Func_class: Q Secondary metabolites biosynthesis, transport and catabolism # Function: Putative multicopper oxidases # Organism: Corynebacterium glutamicum # 17 527 4 493 493 196 30.0 7e-50
Contig_1424_209655_134	144396-145460	0	COG:CAC2535	COG: CAC2535 COG3391 # Protein_GI_number: 15895798 # Func_class: S Function unknown # Function: Uncharacterized conserved protein # Organism: Clostridium acetobutylicum # 29 351 44 351 352 175 32.0 2e-43
Contig_1424_209655_135	145172-145762	0	COG:no
Contig_1424_209655_136	145766-146008	0	COG:no
Contig_1424_209655_138	147200-148054	0	COG:mll8086	COG: mll8086 COG3496 # Protein_GI_number: 13476695 # Func_class: S Function unknown # Function: Uncharacterized conserved protein # Organism: Mesorhizobium loti # 14 259 9 255 272 155 35.0 1e-37
Contig_1424_209655_139	148051-149355	0	COG:AGc3599	COG: AGc3599 COG2907 # Protein_GI_number: 15889269 # Func_class: R General function prediction only # Function: Predicted NAD/FAD-binding protein # Organism: Agrobacterium tumefaciens strain C58 (Cereon) # 12 426 13 423 457 373 47.0 1e-103
Contig_1424_209655_140	149448-150068	0	COG:CC3478	COG: CC3478 COG3040 # Protein_GI_number: 16127708 # Func_class: M Cell wall/membrane/envelope biogenesis # Function: Bacterial lipocalin # Organism: Caulobacter vibrioides # 13 191 10 180 181 70 29.0 1e-12
Contig_1424_209655_141	150065-151996	0	COG:CC2601	COG: CC2601 COG2230 # Protein_GI_number: 16126838 # Func_class: M Cell wall/membrane/envelope biogenesis # Function: Cyclopropane fatty acid synthase and related methyltransferases # Organism: Caulobacter vibrioides # 299 634 8 336 347 311 48.0 2e-84
Contig_1424_209655_142	152153-152887	0	COG:AGc3608	COG: AGc3608 COG5343 # Protein_GI_number: 15889275 # Func_class: S Function unknown # Function: Uncharacterized protein conserved in bacteria # Organism: Agrobacterium tumefaciens strain C58 (Cereon) # 10 243 19 240 240 102 30.0 5e-22
Contig_1424_209655_143	152884-153495	0	COG:mll4824	COG: mll4824 COG1595 # Protein_GI_number: 13474039 # Func_class: K Transcription # Function: DNA-directed RNA polymerase specialized sigma subunit, sigma24 homolog # Organism: Mesorhizobium loti # 30 203 6 179 179 153 42.0 2e-37
Contig_1424_209655_144	153746-154315	0	COG:CC3478	COG: CC3478 COG3040 # Protein_GI_number: 16127708 # Func_class: M Cell wall/membrane/envelope biogenesis # Function: Bacterial lipocalin # Organism: Caulobacter vibrioides # 1 189 1 178 181 210 53.0 1e-54
Contig_1424_209655_145	154892-157234	0	COG:VC1582	COG: VC1582 COG3002 # Protein_GI_number: 15641590 # Func_class: S Function unknown # Function: Uncharacterized protein conserved in bacteria # Organism: Vibrio cholerae # 20 774 102 852 862 579 44.0 1e-165
Contig_1424_209655_146	157496-159088	0	COG:VC1581	COG: VC1581 COG1009 # Protein_GI_number: 15641589 # Func_class: C Energy production and conversion; P Inorganic ion transport and metabolism # Function: NADH:ubiquinone oxidoreductase subunit 5 (chain L)/Multisubunit Na+/H+ antiporter, MnhA subunit # Organism: Vibrio cholerae # 35 530 21 515 516 274 40.0 3e-73
Contig_1424_209655_160	197994-198533	0	COG:no
Contig_1424_209655_161	198815-198925	0	COG:no
Contig_1424_209655_164	201792-202094	0	COG:no
Contig_1424_209655_26	24158-24349	0	COG:no
Contig_1424_209655_42	44383-44910	0	COG:no
Contig_1424_209655_46	48541-49146	0	COG:no
Contig_1424_209655_52	54812-57295	0	COG:PA4879	COG: PA4879 COG2982 # Protein_GI_number: 15600072 # Func_class: M Cell wall/membrane/envelope biogenesis # Function: Uncharacterized protein involved in outer membrane biogenesis # Organism: Pseudomonas aeruginosa # 356 821 216 683 689 553 56.0 1e-157
Contig_1424_209655_6	3840-4823	0	COG:RSc1205	COG: RSc1205 COG2518 # Protein_GI_number: 17545924 # Func_class: O Posttranslational modification, protein turnover, chaperones # Function: Protein-L-isoaspartate carboxylmethyltransferase # Organism: Ralstonia solanacearum # 118 327 96 321 321 283 65.0 3e-76
Contig_1424_209655_76	86971-88971	0	COG:PM1461	COG: PM1461 COG2855 # Protein_GI_number: 15603326 # Func_class: S Function unknown # Function: Predicted membrane protein # Organism: Pasteurella multocida # 332 657 9 328 336 219 35.0 1e-56
Contig_1424_209655_83	94334-94540	0	COG:no
Contig_1424_209655_89	99008-99523	0	COG:no
Contig_1424_209655_96	104546-104926	0	COG:no
Contig_160_28594_10	12430-12894	0	COG:no
Contig_160_28594_18	20724-20912	0	COG:no
Contig_160_28594_2	1900-2316	0	COG:BH3304	COG: BH3304 COG2259 # Protein_GI_number: 15615866 # Func_class: S Function unknown # Function: Predicted membrane protein # Organism: Bacillus halodurans # 9 105 7 98 129 57 42.0 6e-09
Contig_167_19135_1	246-1457	0	COG:ECs3512	COG: ECs3512 COG0582 # Protein_GI_number: 15832766 # Func_class: L Replication, recombination and repair # Function: Integrase # Organism: Escherichia coli O157:H7 # 1 391 19 390 401 140 27.0 3e-33
Contig_167_19135_10	8325-8489	0	COG:no
Contig_167_19135_13	13062-15095	0	COG:no
Contig_167_19135_15	17364-18059	0	COG:PA1371	COG: PA1371 COG5619 # Protein_GI_number: 15596568 # Func_class: S Function unknown # Function: Uncharacterized conserved protein # Organism: Pseudomonas aeruginosa # 20 231 19 233 233 124 33.0 2e-28
Contig_167_19135_16	18342-19121	0	COG:no
Contig_167_19135_2	1432-2976	0	COG:PM1948	COG: PM1948 COG0582 # Protein_GI_number: 15603813 # Func_class: L Replication, recombination and repair # Function: Integrase # Organism: Pasteurella multocida # 63 499 46 496 506 158 26.0 2e-38
Contig_167_19135_3	2976-4982	0	COG:PM1947	COG: PM1947 COG4688 # Protein_GI_number: 15603812 # Func_class: S Function unknown # Function: Uncharacterized protein conserved in bacteria # Organism: Pasteurella multocida # 6 640 4 638 678 189 26.0 2e-47
Contig_167_19135_4	4979-5413	0	COG:no
Contig_167_19135_5	5479-5700	0	COG:no
Contig_167_19135_6	5953-6201	0	COG:no
Contig_167_19135_7	6194-6844	0	COG:no
Contig_167_19135_8	6841-7248	0	COG:no
Contig_167_19135_9	8009-8242	0	COG:msr6108	COG: msr6108 COG1396 # Protein_GI_number: 13475102 # Func_class: K Transcription # Function: Predicted transcriptional regulators # Organism: Mesorhizobium loti # 13 76 6 69 71 61 53.0 4e-10
Contig_225_14150_10	9489-10058	0	COG:PH1536	COG: PH1536 COG1371 # Protein_GI_number: 14591318 # Func_class: S Function unknown # Function: Uncharacterized conserved protein # Organism: Pyrococcus horikoshii # 55 189 4 142 142 94 35.0 1e-19
Contig_230_2062_2	1626-2060	0	COG:no
Contig_241_5299_2	61-300	0	COG:no
Contig_254_25662_21	20151-20456	0	COG:no
Contig_254_25662_23	21841-22920	0	COG:RSc0060	COG: RSc0060 COG1792 # Protein_GI_number: 17544779 # Func_class: M Cell wall/membrane/envelope biogenesis # Function: Cell shape-determining protein # Organism: Ralstonia solanacearum # 1 302 1 298 346 251 48.0 2e-66
Contig_272_140_1	3-138	0	COG:no
Contig_296_554_1	2-554	0	COG:mll2848	COG: mll2848 COG5295 # Protein_GI_number: 13472521 # Func_class: U Intracellular trafficking, secretion, and vesicular transport; W Extracellular structures # Function: Autotransporter adhesin # Organism: Mesorhizobium loti # 10 134 1631 1782 1953 114 49.0 1e-25
Contig_302_16546_13	14618-15112	0	COG:no
Contig_302_16546_2	644-1258	0	COG:mll5357	COG: mll5357 COG3865 # Protein_GI_number: 13474466 # Func_class: S Function unknown # Function: Uncharacterized protein conserved in bacteria # Organism: Mesorhizobium loti # 126 202 81 156 156 73 47.0 2e-13
Contig_30_24542_16	18862-19767	0	COG:PA1261	COG: PA1261 COG2207 # Protein_GI_number: 15596458 # Func_class: K Transcription # Function: AraC-type DNA-binding domain-containing proteins # Organism: Pseudomonas aeruginosa # 78 301 1 224 224 269 58.0 6e-72
Contig_30_24542_5	4340-5287	0	COG:STM0427	COG: STM0427 COG0555 # Protein_GI_number: 16763807 # Func_class: O Posttranslational modification, protein turnover, chaperones # Function: ABC-type sulfate transport system, permease component # Organism: Salmonella typhimurium LT2 # 59 306 33 281 286 159 36.0 5e-39
Contig_306_3210_1	3-195	0	COG:YPO2151	COG: YPO2151 COG0697 # Protein_GI_number: 16122384 # Func_class: G Carbohydrate transport and metabolism; E Amino acid transport and metabolism; R General function prediction only # Function: Permeases of the drug/metabolite transporter (DMT) superfamily # Organism: Yersinia pestis # 4 57 9 62 373 57 55.0 6e-09
Contig_321_21772_1	364-540	0	COG:no
Contig_321_21772_16	21475-21660	0	COG:no
Contig_321_21772_4	2728-4551	0	COG:no
Contig_321_21772_5	4551-7229	0	COG:no
Contig_321_21772_6	7251-7901	0	COG:no
Contig_321_21772_7	8079-8870	0	COG:no
Contig_321_21772_8	8836-10044	0	COG:slr2130	COG: slr2130 COG0337 # Protein_GI_number: 16330660 # Func_class: E Amino acid transport and metabolism # Function: 3-dehydroquinate synthetase # Organism: Synechocystis # 60 375 40 353 361 179 32.0 1e-44
Contig_321_21772_9	10107-11267	0	COG:slr2114	COG: slr2114 COG0399 # Protein_GI_number: 16330643 # Func_class: M Cell wall/membrane/envelope biogenesis # Function: Predicted pyridoxal phosphate-dependent enzyme apparently involved in regulation of cell wall biogenesis # Organism: Synechocystis # 14 369 21 345 345 171 29.0 3e-42
Contig_326_16438_15	14500-14931	0	COG:no
Contig_326_16438_5	3653-4105	0	COG:no
Contig_326_16438_9	7870-8091	0	COG:no
Contig_341_4786_2	369-2030	0	COG:RSc3058	COG: RSc3058 COG2942 # Protein_GI_number: 17547777 # Func_class: G Carbohydrate transport and metabolism # Function: N-acyl-D-glucosamine 2-epimerase # Organism: Ralstonia solanacearum # 179 551 2 396 410 240 41.0 6e-63
Contig_366_21938_2	1875-2069	0	COG:no
Contig_366_21938_3	2098-2679	0	COG:no
Contig_383_14925_10	11279-11476	0	COG:no
Contig_383_14925_13	13552-14016	0	COG:no
Contig_383_14925_14	14028-14168	0	COG:no
Contig_383_14925_9	10291-11163	0	COG:Z1787	COG: Z1787 COG1266 # Protein_GI_number: 15801262 # Func_class: R General function prediction only # Function: Predicted metal-dependent membrane protease # Organism: Escherichia coli O157:H7 EDL933 # 87 287 77 272 274 126 41.0 6e-29
Contig_395_1066_1	3-192	0	COG:no
Contig_395_1066_2	293-742	0	COG:RSc1907	COG: RSc1907 COG1396 # Protein_GI_number: 17546626 # Func_class: K Transcription # Function: Predicted transcriptional regulators # Organism: Ralstonia solanacearum # 7 115 21 128 173 92 47.0 3e-19
Contig_395_1066_3	739-1066	0	COG:no
Contig_396_34340_32	31702-33525	0	COG:RSc0487	COG: RSc0487 COG0418 # Protein_GI_number: 17545206 # Func_class: F Nucleotide transport and metabolism # Function: Dihydroorotase # Organism: Ralstonia solanacearum # 263 607 4 344 344 550 78.0 1e-156
Contig_400_43082_26	40226-40678	0	COG:no
Contig_413_10678_7	4442-4693	0	COG:no
Contig_431_16157_1	5955-03-01	0	COG:BS_pksL_1	COG: BS_pksL_1 COG3321 # Protein_GI_number: 16078781 # Func_class: Q Secondary metabolites biosynthesis, transport and catabolism # Function: Polyketide synthase modules and related proteins # Organism: Bacillus subtilis # 119 993 4 803 1814 705 43.0 0
Contig_431_16157_8	16001-16156	0	COG:no
Contig_43_3463_1	2-583	0	COG:BS_pksL_2	COG: BS_pksL_2 COG3321 # Protein_GI_number: 16078781 # Func_class: Q Secondary metabolites biosynthesis, transport and catabolism # Function: Polyketide synthase modules and related proteins # Organism: Bacillus subtilis # 5 81 814 890 950 83 41.0 3e-16
Contig_435_28181_10	12369-12827	0	COG:no
Contig_435_28181_13	15696-15932	0	COG:no
Contig_435_28181_20	22338-22799	0	COG:no
Contig_435_28181_25	27421-27684	0	COG:no
Contig_457_36289_15	16178-16879	0	COG:no
Contig_457_36289_17	18862-19443	0	COG:STM4201	COG: STM4201 COG4385 # Protein_GI_number: 16767451 # Func_class: R General function prediction only # Function: Bacteriophage P2-related tail formation protein # Organism: Salmonella typhimurium LT2 # 1 100 1 101 210 120 59.0 2e-27
Contig_457_36289_18	19436-20587	0	COG:STM4202	COG: STM4202 COG3948 # Protein_GI_number: 16767452 # Func_class: R General function prediction only # Function: Phage-related baseplate assembly protein # Organism: Salmonella typhimurium LT2 # 1 383 1 371 371 381 51.0 1e-105
Contig_457_36289_19	20584-20937	0	COG:STM4203	COG: STM4203 COG3628 # Protein_GI_number: 16767453 # Func_class: R General function prediction only # Function: Phage baseplate assembly protein W # Organism: Salmonella typhimurium LT2 # 1 115 1 116 119 143 61.0 6e-35
Contig_457_36289_20	21232-21669	0	COG:no
Contig_457_36289_21	21672-22754	0	COG:STM2706	COG: STM2706 COG5301 # Protein_GI_number: 16766019 # Func_class: R General function prediction only # Function: Phage-related tail fibre protein # Organism: Salmonella typhimurium LT2 # 36 122 150 259 524 68 39.0 3e-11
Contig_457_36289_22	22917-23213	0	COG:no
Contig_457_36289_23	23227-23829	0	COG:STM4207	COG: STM4207 COG4540 # Protein_GI_number: 16767457 # Func_class: R General function prediction only # Function: Phage P2 baseplate assembly protein gpV # Organism: Salmonella typhimurium LT2 # 9 200 3 240 240 136 37.0 3e-32
Contig_457_36289_24	23826-25031	0	COG:STM4208	COG: STM4208 COG3500 # Protein_GI_number: 16767458 # Func_class: R General function prediction only # Function: Phage protein D # Organism: Salmonella typhimurium LT2 # 9 356 2 341 347 290 44.0 4e-78
Contig_457_36289_25	25019-25225	0	COG:no
Contig_457_36289_26	25225-26127	0	COG:no
Contig_457_36289_27	26129-28687	0	COG:XF0730	COG: XF0730 COG5283 # Protein_GI_number: 15837332 # Func_class: S Function unknown # Function: Phage-related tail protein # Organism: Xylella fastidiosa 9a5c # 69 679 56 605 739 78 24.0 6e-14
Contig_457_36289_28	28838-29053	0	COG:no
Contig_457_36289_29	28968-29297	0	COG:no
Contig_457_36289_30	29610-30134	0	COG:STM4212	COG: STM4212 COG3498 # Protein_GI_number: 16767462 # Func_class: R General function prediction only # Function: Phage tail tube protein FII # Organism: Salmonella typhimurium LT2 # 1 174 1 174 174 273 70.0 2e-73
Contig_457_36289_31	30136-31569	0	COG:STM4213	COG: STM4213 COG3497 # Protein_GI_number: 16767463 # Func_class: R General function prediction only # Function: Phage tail sheath protein FI # Organism: Salmonella typhimurium LT2 # 1 474 1 472 475 700 70.0 0
Contig_457_36289_32	31573-31818	0	COG:no
Contig_457_36289_33	31815-32279	0	COG:no
Contig_457_36289_34	33097-33429	0	COG:no
Contig_457_36289_35	33426-33764	0	COG:no
Contig_457_36289_36	33761-34363	0	COG:no
Contig_457_36289_37	34360-34968	0	COG:STM4217	COG: STM4217 COG0741 # Protein_GI_number: 16767467 # Func_class: M Cell wall/membrane/envelope biogenesis # Function: Soluble lytic murein transglycosylase and related regulatory proteins (some contain LysM/invasin domains) # Organism: Salmonella typhimurium LT2 # 10 195 8 195 201 209 55.0 2e-54
Contig_457_36289_38	34971-35318	0	COG:no
Contig_457_36289_39	35812-36048	0	COG:no
Contig_462_1428_1	1-1413	0	COG:no
Contig_481_16893_7	6940-8205	0	COG:no
Contig_481_16893_8	8255-9844	0	COG:no
Contig_485_5453_1	5140-5430	0	COG:no
Contig_494_20242_12	12159-12812	0	COG:STM3959	COG: STM3959 COG1280 # Protein_GI_number: 16767229 # Func_class: E Amino acid transport and metabolism # Function: Putative threonine efflux protein # Organism: Salmonella typhimurium LT2 # 3 217 1 206 206 121 30.0 1e-27
Contig_502_5257_1	2-253	0	COG:RSc1006	COG: RSc1006 COG2878 # Protein_GI_number: 17545725 # Func_class: C Energy production and conversion # Function: Predicted NADH:ubiquinone oxidoreductase, subunit RnfB # Organism: Ralstonia solanacearum # 7 74 205 266 268 66 55.0 1e-11
Contig_508_2120_2	764-1597	0	COG:STM0654	COG: STM0654 COG0790 # Protein_GI_number: 16764031 # Func_class: R General function prediction only # Function: FOG: TPR repeat, SEL1 subfamily # Organism: Salmonella typhimurium LT2 # 48 249 119 310 331 95 35.0 1e-19
Contig_514_26941_17	17643-19973	0	COG:RSc2357	COG: RSc2357 COG0181 # Protein_GI_number: 17547076 # Func_class: H Coenzyme transport and metabolism # Function: Porphobilinogen deaminase # Organism: Ralstonia solanacearum # 446 764 7 326 334 388 71.0 1e-107
Contig_514_26941_2	202-699	0	COG:SMc00906	COG: SMc00906 COG0454 # Protein_GI_number: 15964552 # Func_class: K Transcription; R General function prediction only # Function: Histone acetyltransferase HPA2 and related acetyltransferases # Organism: Sinorhizobium meliloti # 1 157 1 157 159 209 66.0 2e-54
Contig_514_26941_8	7538-7762	0	COG:no
Contig_519_58877_16	16772-16999	0	COG:no
Contig_519_58877_40	41611-42075	0	COG:no
Contig_519_58877_50	51143-51598	0	COG:no
Contig_519_58877_51	51673-51960	0	COG:no
Contig_539_5940_3	3132-3437	0	COG:no
Contig_539_5940_4	4230-4595	0	COG:no
Contig_543_14065_6	6077-6340	0	COG:no
Contig_546_26872_1	2-121	0	COG:no
Contig_546_26872_15	16729-17115	0	COG:no
Contig_546_26872_20	20612-21529	0	COG:no
Contig_620_53148_18	18853-19230	0	COG:RSc2063	COG: RSc2063 COG1314 # Protein_GI_number: 17546782 # Func_class: U Intracellular trafficking, secretion, and vesicular transport # Function: Preprotein translocase subunit SecG # Organism: Ralstonia solanacearum # 1 89 1 89 115 120 78.0 5e-28
Contig_620_53148_53	51319-51717	0	COG:no
Contig_642_9521_5	6389-7927	0	COG:mll2542	COG: mll2542 COG0477 # Protein_GI_number: 13472297 # Func_class: G Carbohydrate transport and metabolism; E Amino acid transport and metabolism; P Inorganic ion transport and metabolism; R General function prediction only # Function: Permeases of the major facilitator superfamily # Organism: Mesorhizobium loti # 18 462 8 413 505 221 34.0 2e-57
Contig_651_12359_5	5556-5858	0	COG:no
Contig_651_12359_6	5994-6368	0	COG:no
Contig_656_40733_21	25092-26072	0	COG:PA3089	COG: PA3089 COG3782 # Protein_GI_number: 15598285 # Func_class: S Function unknown # Function: Uncharacterized protein conserved in bacteria # Organism: Pseudomonas aeruginosa # 14 317 12 306 321 107 35.0 2e-23
Contig_656_40733_33	38009-38632	0	COG:RSc1354	COG: RSc1354 COG0684 # Protein_GI_number: 17546073 # Func_class: H Coenzyme transport and metabolism # Function: Demethylmenaquinone methyltransferase # Organism: Ralstonia solanacearum # 43 205 4 166 168 209 68.0 2e-54
Contig_656_40733_7	10196-10444	0	COG:no
Contig_659_40350_33	34026-35357	0	COG:no
Contig_659_40350_5	4341-4538	0	COG:no
Contig_665_7023_1	3-416	0	COG:mlr4917	COG: mlr4917 COG3839 # Protein_GI_number: 13474108 # Func_class: G Carbohydrate transport and metabolism # Function: ABC-type sugar transport systems, ATPase components # Organism: Mesorhizobium loti # 40 98 299 357 363 60 50.0 7e-10
Contig_665_7023_4	3524-4525	0	COG:RSc0327	COG: RSc0327 COG1686 # Protein_GI_number: 17545046 # Func_class: M Cell wall/membrane/envelope biogenesis # Function: D-alanyl-D-alanine carboxypeptidase # Organism: Ralstonia solanacearum # 54 301 39 286 397 253 48.0 3e-67
Contig_671_17427_11	16193-17044	0	COG:no
Contig_671_17427_7	4883-5146	0	COG:no
Contig_710_4328_6	3689-3886	0	COG:no
Contig_746_26738_4	3031-3630	0	COG:RSp0438	COG: RSp0438 COG1335 # Protein_GI_number: 17548659 # Func_class: Q Secondary metabolites biosynthesis, transport and catabolism # Function: Amidases related to nicotinamidase # Organism: Ralstonia solanacearum # 1 195 1 195 197 235 57.0 5e-62
Contig_746_26738_5	3642-4850	0	COG:RSp0437	COG: RSp0437 COG0477 # Protein_GI_number: 17548658 # Func_class: G Carbohydrate transport and metabolism; E Amino acid transport and metabolism; P Inorganic ion transport and metabolism; R General function prediction only # Function: Permeases of the major facilitator superfamily # Organism: Ralstonia solanacearum # 1 390 1 390 406 579 75.0 1e-165
Contig_746_26738_6	4942-5592	0	COG:RSp0436	COG: RSp0436 COG1802 # Protein_GI_number: 17548657 # Func_class: K Transcription # Function: Transcriptional regulators # Organism: Ralstonia solanacearum # 14 215 1 202 205 263 66.0 1e-70
Contig_774_14800_15	13934-14446	0	COG:no
Contig_793_818_1	3-230	0	COG:no
Contig_794_15702_6	5839-7344	0	COG:RSp0615	COG: RSp0615 COG1797 # Protein_GI_number: 17548836 # Func_class: H Coenzyme transport and metabolism # Function: Cobyrinic acid a,c-diamide synthase # Organism: Ralstonia solanacearum # 4 215 11 222 438 271 67.0 2e-72
Contig_794_15702_9	9020-9499	0	COG:no
Contig_801_931_1	1-163	0	COG:no
Contig_802_11546_1	2-629	0	COG:no
Contig_802_11546_2	739-981	0	COG:no
Contig_802_11546_3	1404-1871	0	COG:no
Contig_802_11546_5	3075-6401	0	COG:STM2271_1	COG: STM2271_1 COG0642 # Protein_GI_number: 16765598 # Func_class: T Signal transduction mechanisms # Function: Signal transduction histidine kinase # Organism: Salmonella typhimurium LT2 # 255 725 246 699 699 232 31.0 3e-60
Contig_802_11546_7	7768-7959	0	COG:no
Contig_810_593_1	3-591	0	COG:RSp1620	COG: RSp1620 COG5295 # Protein_GI_number: 17549839 # Func_class: U Intracellular trafficking, secretion, and vesicular transport; W Extracellular structures # Function: Autotransporter adhesin # Organism: Ralstonia solanacearum # 71 158 988 1078 1309 59 48.0 4e-09
Contig_8_28243_14	15789-16022	0	COG:no
Contig_8_28243_18	18940-19149	0	COG:no
Contig_8_28243_2	842-1042	0	COG:no
Contig_8_28243_27	27595-28119	0	COG:RSp1620	COG: RSp1620 COG5295 # Protein_GI_number: 17549839 # Func_class: U Intracellular trafficking, secretion, and vesicular transport; W Extracellular structures # Function: Autotransporter adhesin # Organism: Ralstonia solanacearum # 10 174 1124 1309 1309 182 56.0 2e-46
Contig_8_28243_3	1885-2760	0	COG:no
Contig_837_25078_2	1675-2625	0	COG:no
Contig_84_2716_2	1302-1520	0	COG:no
Contig_84_2716_3	1706-2281	0	COG:no
Contig_843_9024_1	1-148	0	COG:no
Contig_843_9024_8	7587-8111	0	COG:no
Contig_851_4928_6	4016-4927	0	COG:AGc369	COG: AGc369 COG5010 # Protein_GI_number: 15887567 # Func_class: U Intracellular trafficking, secretion, and vesicular transport # Function: Flp pilus assembly protein TadD, contains TPR repeats # Organism: Agrobacterium tumefaciens strain C58 (Cereon) # 47 240 79 268 289 66 27.0 6e-11
Contig_85_1946_1	1945-01-01	0	COG:BS_pksK_2	COG: BS_pksK_2 COG3321 # Protein_GI_number: 16078780 # Func_class: Q Secondary metabolites biosynthesis, transport and catabolism # Function: Polyketide synthase modules and related proteins # Organism: Bacillus subtilis # 10 644 929 1525 1575 300 30.0 9e-81
Contig_857_25821_6	6331-7542	0	COG:XF1728	COG: XF1728 COG2814 # Protein_GI_number: 15838329 # Func_class: G Carbohydrate transport and metabolism # Function: Arabinose efflux permease # Organism: Xylella fastidiosa 9a5c # 15 399 59 443 447 288 47.0 1e-77
Contig_865_40787_27	35811-36242	0	COG:RSc2638	COG: RSc2638 COG0526 # Protein_GI_number: 17547357 # Func_class: O Posttranslational modification, protein turnover, chaperones; C Energy production and conversion # Function: Thiol-disulfide isomerase and thioredoxins # Organism: Ralstonia solanacearum # 4 123 14 133 140 144 63.0 6e-35
Contig_865_40787_3	3450-3584	0	COG:no
Contig_865_40787_5	6032-6196	0	COG:no
Contig_866_4993_1	3-375	0	COG:no
Contig_885_8398_1	1-736	0	COG:RSc0600	COG: RSc0600 COG3009 # Protein_GI_number: 17545319 # Func_class: S Function unknown # Function: Uncharacterized protein conserved in bacteria # Organism: Ralstonia solanacearum # 61 206 54 201 211 92 37.0 5e-19
Contig_885_8398_5	3762-3962	0	COG:no
Contig_892_1717_2	193-501	0	COG:no
Contig_892_1717_5	1458-1716	0	COG:no
Contig_905_14410_4	3572-3844	0	COG:no
Contig_905_14410_8	7180-7335	0	COG:no
Contig_912_1781_1	2-1781	0	COG:BS_pksP_2	COG: BS_pksP_2 COG3321 # Protein_GI_number: 16078784 # Func_class: Q Secondary metabolites biosynthesis, transport and catabolism # Function: Polyketide synthase modules and related proteins # Organism: Bacillus subtilis # 5 435 939 1355 1488 216 32.0 9e-56
Contig_921_14968_6	6249-6449	0	COG:no
Contig_92_1646_1	483-1493	0	COG:STM1264	COG: STM1264 COG1708 # Protein_GI_number: 16764615 # Func_class: R General function prediction only # Function: Predicted nucleotidyltransferases # Organism: Salmonella typhimurium LT2 # 74 330 1 257 262 217 44.0 2e-56
Contig_922_21848_13	15795-16109	0	COG:no
Contig_922_21848_17	18687-19232	0	COG:RSc2085	COG: RSc2085 COG0818 # Protein_GI_number: 17546804 # Func_class: M Cell wall/membrane/envelope biogenesis # Function: Diacylglycerol kinase # Organism: Ralstonia solanacearum # 30 173 9 146 153 141 59.0 5e-34
Contig_922_21848_8	9120-9851	0	COG:PA2106	COG: PA2106 COG2872 # Protein_GI_number: 15597302 # Func_class: R General function prediction only # Function: Predicted metal-dependent hydrolases related to alanyl-tRNA synthetase HxxxH domain # Organism: Pseudomonas aeruginosa # 3 242 4 243 244 290 58.0 2e-78
Contig_924_932_1	2-235	0	COG:no
Contig_925_362_1	1-361	0	COG:no
Contig_935_57079_21	18428-18622	0	COG:no
Contig_935_57079_24	19786-20058	0	COG:no
Contig_935_57079_36	29182-29463	0	COG:no
Contig_935_57079_4	3063-3599	0	COG:no
Contig_935_57079_45	36503-36685	0	COG:no
Contig_935_57079_46	36718-37008	0	COG:no
Contig_935_57079_47	36895-37224	0	COG:no
Contig_935_57079_48	37215-38075	0	COG:no
Contig_935_57079_54	41505-41786	0	COG:no
Contig_935_57079_61	50741-51256	0	COG:no
Contig_935_57079_62	51334-51582	0	COG:no
Contig_935_57079_65	54256-54429	0	COG:no
Contig_942_39869_6	7132-7509	0	COG:PA3445	COG: PA3445 COG0715 # Protein_GI_number: 15598641 # Func_class: P Inorganic ion transport and metabolism # Function: ABC-type nitrate/sulfonate/bicarbonate transport systems, periplasmic components # Organism: Pseudomonas aeruginosa # 1 98 210 307 323 82 39.0 2e-16
Contig_942_39869_8	9992-10471	0	COG:no
Contig_96_3102_1	3-176	0	COG:no
Contig_966_17357_12	13615-13896	0	COG:no
Contig_976_5099_1	5097-03-01	0	COG:BS_pksM_1	COG: BS_pksM_1 COG3321 # Protein_GI_number: 16078782 # Func_class: Q Secondary metabolites biosynthesis, transport and catabolism # Function: Polyketide synthase modules and related proteins # Organism: Bacillus subtilis # 757 1676 394 1293 2319 602 37.0 1e-171
