# Supplementary material for: Gene and Protein Expression in Response to Different Growth Temperatures and Oxygen Availability in Burkholderia thailandensis
Source: PLoS One. 2014 Mar 26;9(3):e93009. doi: 10.1371/journal.pone.0093009 (PMC3966863; doi:10.1371/journal.pone.0093009)
Supplement: File S8 — List of all the 54 Outer Membrane-associated proteins found to be differentially expressed in the 37°C versus 28°C comparison. Significant differential expression was defined as described in Methods (Differential Average: DAve>0.2 and DAve<−0.2; Differential Coefficient Index: DCI>200 and DCI<−200). (XLS) [file pone.0093009.s012.xls]

## Sheet: Foglio1
37°C vs 28°C
Gene_ID	pI	MW	DAve	cellular localization	COG ID	protein name description	functional category
BTH_I1123	4.7	41582	150	Cytoplasmic	COG0206	FtsZ, Cell division GTPase	Cell division and chromosome partitioning].
BTH_I3058	10.7	13436	150		COG0093	RplN, Ribosomal protein L14	Translation, ribosomal structure and biogenesis].
BTH_I2900	6.1	60347	133.141	Cytoplasmic	COG1012	PutA, NAD-dependent aldehyde dehydrogenases	Energy production and conversion].
BTH_I1224	6.2	46846	133.093	Cytoplasmic	COG0334	GdhA, Glutamate dehydrogenase/leucine dehydrogenase	Amino acid transport and metabolism].
BTH_I1403	7.4	35871	124.826	Cytoplasmic	COG0583	LysR, Transcriptional regulator	Transcription].
BTH_I3308	5.1	50605	110.867	Cytoplasmic	COG0055	AtpD, F0F1-type ATP synthase, beta subunit	Energy production and conversion].
BTH_I0211	5.4	30406	100	Cytoplasmic	COG1018	Hmp, Flavodoxin reductases (ferredoxin-NADPH reductases) family 1	Energy production and conversion].
BTH_I1661	11.7	9441	100	Cytoplasmic	COG0228	RpsP, Ribosomal protein S16	Translation, ribosomal structure and biogenesis].
BTH_I1664	10.8	14411	100	Cytoplasmic	COG0335	RplS, Ribosomal protein L19	Translation, ribosomal structure and biogenesis].
BTH_I1894	4.7	45723	100	Cytoplasmic	COG0148	Eno, Enolase	Carbohydrate transport and metabolism].
BTH_I2122	6.1	89159	100	Cytoplasmic	COG0466	Lon, ATP-dependent Lon protease, bacterial type	Posttranslational modification, protein turnover, chaperones].
BTH_I2556	6.2	106460	100	Cytoplasmic	COG0567	SucA, 2-oxoglutarate dehydrogenase complex, dehydrogenase (E1) component, and related enzymes	Energy production and conversion].
BTH_I2963	5	54776	100	Cytoplasmic	COG3517	COG3517, Uncharacterized protein conserved in bacteria	Function unknown].
BTH_I3059	10.2	10261	100	Cytoplasmic	COG0186	RpsQ, Ribosomal protein S17	Translation, ribosomal structure and biogenesis].
BTH_I1458	5	57127	98.9678	Cytoplasmic	COG0459	GroL, Chaperonin GroEL (HSP60 family)	Posttranslational modification, protein turnover, chaperones].
BTH_I3067	10	22848	98.4335	Cytoplasmic	COG0088	RplD, Ribosomal protein L4	Translation, ribosomal structure and biogenesis].
BTH_I3043	10.5	23163	96.4053	Cytoplasmic	COG0522	RpsD, Ribosomal protein S4 and related proteins	Translation, ribosomal structure and biogenesis].
BTH_I2118	4.9	49650	91.3223	Cytoplasmic	COG0544	Tig, FKBP-type peptidyl-prolyl cis-trans isomerase (trigger factor)	Posttranslational modification, protein turnover, chaperones].
BTH_I3062	11	29901	88.4381	Cytoplasmic	COG0092	RpsC, Ribosomal protein S3	Translation, ribosomal structure and biogenesis].
BTH_I3070	5.2	42973	78.7276	Cytoplasmic	COG0050	TufB, GTPases - translation elongation factors	Translation, ribosomal structure and biogenesis].
BTH_II1990	5.1	15287	74.7521	Unknown
BTH_II1544	9.6	52560	74.6615	Extracellular	COG1345	FliD, Flagellar capping protein	Cell motility and secretion].
BTH_I2962	6.5	18329	66.8776	Extracellular	COG3157	Hcp, Hemolysin-coregulated protein (uncharacterized)	Function unknown].
BTH_I2027	7.8	27138	66.4707		COG0052	RpsB, Ribosomal protein S2	Translation, ribosomal structure and biogenesis].
BTH_I3065	11.9	30262	63.0318	Cytoplasmic	COG0090	RplB, Ribosomal protein L2	Translation, ribosomal structure and biogenesis].
BTH_I1234	11.1	14307	62.4102	Cytoplasmic	COG0103	RpsI, Ribosomal protein S9	Translation, ribosomal structure and biogenesis].
BTH_I0283	6.9	84775	50	Cytoplasmic Membrane	COG2217	ZntA, Cation transport ATPase	Inorganic ion transport and metabolism].
BTH_I3076	5.4	153130	43.9878	Cytoplasmic	COG0085	RpoB, DNA-directed RNA polymerase, beta subunit/140 kD subunit	Transcription].
BTH_II1638	6.5	13553	36.2846	Unknown
BTH_I0680	9.8	43199	33.3846	Cytoplasmic Membrane	COG0845	AcrA, Membrane-fusion protein	Cell envelope biogenesis, outer membrane].
BTH_II0036	6.1	16567	28.9814	Cytoplasmic	COG0589	UspA, Universal stress protein UspA and related nucleotide-binding proteins	Signal transduction mechanisms].
BTH_I3310	5.4	55893	28.5235	Cytoplasmic	COG0056	AtpA, F0F1-type ATP synthase, alpha subunit	Energy production and conversion].
BTH_I1284	5.9	18119	18.0066	Cytoplasmic	COG0783	Dps, DNA-binding ferritin-like protein (oxidative damage protectant)	Inorganic ion transport and metabolism].
BTH_I0681	6.1	114683	14.4423	Cytoplasmic Membrane	COG0841	AcrB, Cation/multidrug efflux pump	Defense mechanisms].
BTH_I1155	12.6	19413	11.0656	Outer Membrane
BTH_I3073	11.4	13924	9.96114	Cytoplasmic	COG0048	RpsL, Ribosomal protein S12	Translation, ribosomal structure and biogenesis].
BTH_II2310	6	81750	1.99698	Unknown	COG1251	NirB, NAD(P)H-nitrite reductase	Energy production and conversion].
BTH_I0857	11	26617	-9.95383	Outer Membrane	COG2885	OmpA, Outer membrane protein and related peptidoglycan-associated (lipo)proteins	Cell envelope biogenesis, outer membrane].
BTH_I1867	5.9	20013	-15.8831	Periplasmic
BTH_I0582	10.3	29218	-17.7566	Cytoplasmic Membrane	COG0204	PlsC, 1-acyl-sn-glycerol-3-phosphate acyltransferase	Lipid metabolism].
BTH_I1372	7.5	18728	-24.6388	Outer Membrane	COG2885	OmpA, Outer membrane protein and related peptidoglycan-associated (lipo)proteins	Cell envelope biogenesis, outer membrane].
BTH_II0418	9.6	74818	-42.7387	Cytoplasmic	COG3243	PhaC, Poly(3-hydroxyalkanoate) synthetase	Lipid metabolism].
BTH_I3204	8.5	23327	-50	Unknown	COG4380	COG4380, Uncharacterized protein conserved in bacteria	Function unknown].
BTH_I1365	9.9	37724	-67.0099	Cytoplasmic Membrane	COG3239	DesA, Fatty acid desaturase	Lipid metabolism].
BTH_I1693	9.8	17252	-69.8792	Unknown	COG3045	CreA, Uncharacterized protein conserved in bacteria	Function unknown].
BTH_I0454	8.5	59133	-71.3558	Cytoplasmic Membrane	COG1271	CydA, Cytochrome bd-type quinol oxidase, subunit 1	Energy production and conversion].
BTH_I0830	9.7	25559	-75.9597	Periplasmic	COG3471	COG3471, Predicted periplasmic/secreted protein	Function unknown].
BTH_II1992	4.7	24376	-83.7314	Unknown
BTH_I0243	4.5	43021	-94.2094	Extracellular	COG1749	FlgE, Flagellar hook protein FlgE	Cell motility and secretion].
BTH_I0200	9.7	71820	-100		COG1766	FliF, Flagellar biosynthesis/type III secretory pathway lipoprotein	Cell motility and secretion / Intracellular trafficking and secretion].
BTH_I2289	9.5	39216	-100	Cytoplasmic Membrane	COG0845	AcrA, Membrane-fusion protein	Cell envelope biogenesis, outer membrane].
BTH_I3196	4.9	38791	-110.172	Extracellular	COG1344	FlgL, Flagellin and related hook-associated proteins	Cell motility and secretion].
BTH_II1243	7.3	61429	-148.112	Unknown	COG2936	COG2936, Predicted acyl esterases	General function prediction only].
BTH_I2625	7.5	62513	-150	Outer Membrane	COG1538	TolC, Outer membrane protein	Cell envelope biogenesis, outer membrane / Intracellular trafficking and secretion].
BTH_II0639	6.2	37513	-150	Extracellular	COG1075	LipA, Predicted acetyltransferases and hydrolases with the alpha/beta hydrolase fold	General function prediction only].
Orange Fill colour: Proteins more expressed at 37°C (DAve > 0.2)
Green Fill colour: Proteins more expressed at 28°C (DAve < -0.2)
